# Supplementary material for: Amino functionalized mesoporous silica decorated with iron oxide nanoparticles as a magnetically recoverable nanoreactor for the synthesis of a new series of 2,4-diphenylpyrido[4,3-d]pyrimidines
Source: Royal Society of Chemistry journal article supplement (doi:10.1039/c4ra00038b), 2014-01-01
Supplement: c4ra00038b1.pdf [file c4ra00038b1.pdf]

**Amino functionalized mesoporous silica decorated with iron oxide  
nanoparticles as a magnetically recoverable nanoreactor for the synthesis of  
new series of 2,4-diphenylpyrido[4,3-d]pyrimidines**

Nasrin Shadjou \*, Mohammad Hasanzadeh \*

Drug Applied Research Center, Tabriz University of Medical Sciences, Tabriz, Iran

Corresponding author: Tel.: +98 411 3379323; fax: +98 411 3363231.

E-mail address: [Nasrin.shadjou@gmail.com](mailto:Nasrin.shadjou@gmail.com), [mhmmd\\_hasanzadeh@yahoo.com](mailto:mhmmd_hasanzadeh@yahoo.com)

## **General remarks**

Melting points were recorded on a Buchi B-540 apparatus. IR spectra were recorded on an ABB Bomem Model FTLA200-100 instrument.  $^1\text{H}$  and  $^{13}\text{C}$ NMR spectra were measured on a Bruker DRX-300 spectrometer, at 300 and 75MHz, using TMS as an internal standard. Chemical shifts ( $\delta$ ) were reported relative to TMS, and coupling constants ( $J$ ) were reported in hertz (Hz). Mass spectra were recorded on a Shimadzu QP 1100 EX mass spectrometer with 70-eV ionization potential. X-ray powder diffraction (XRD) was carried out on a Philips X'Pert diffractometer with  $\text{CuK}\alpha$  radiation. The pore structure of the prepared catalyst was verified by the nitrogen sorption isotherm ([5.0.0.3] Belsorp, BEL Japan, Inc.).

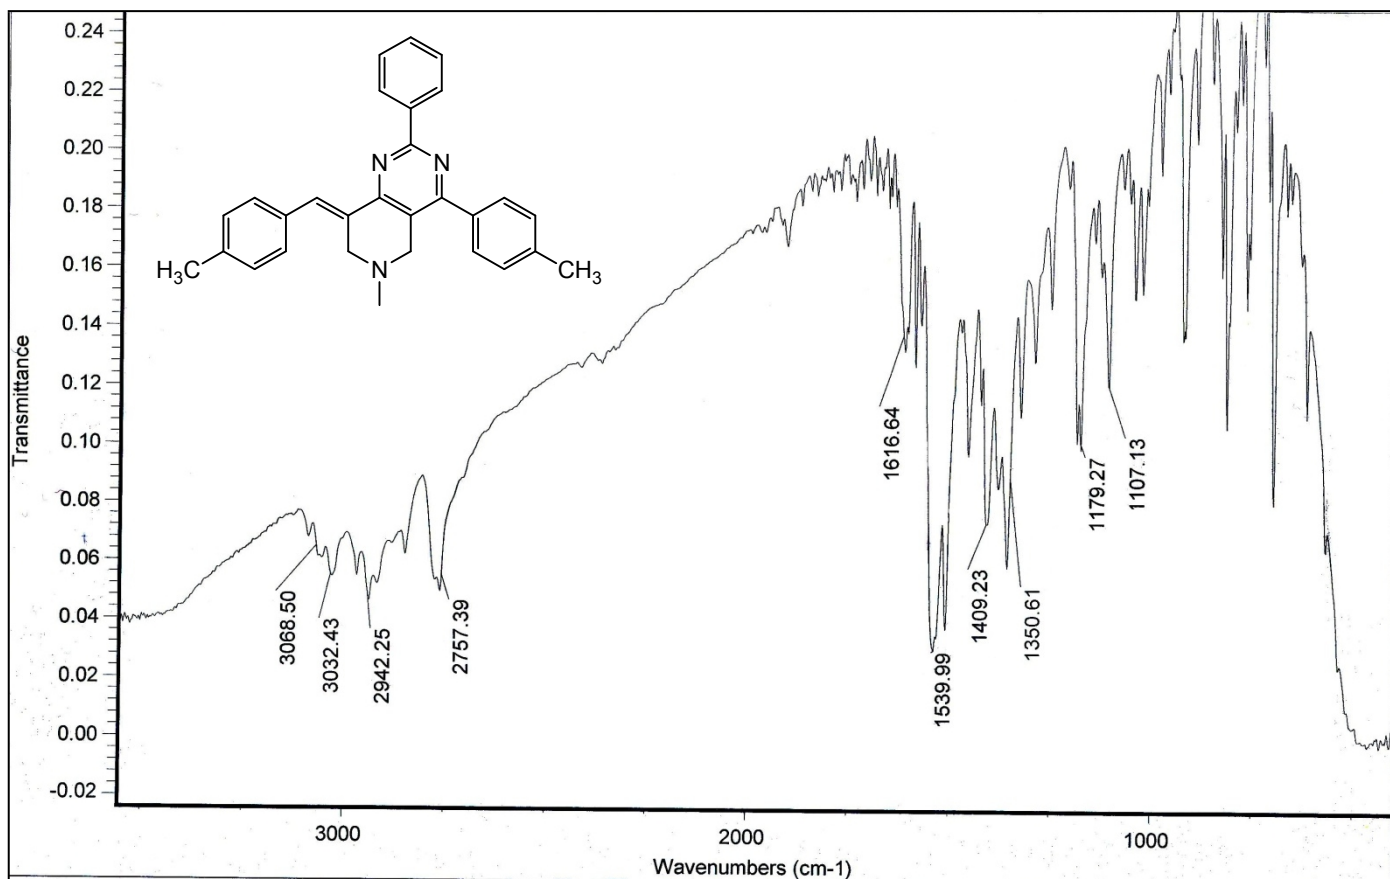

Fig S1: Ft-IR spectra of (E)-8-(4-methylbenzylidene)-4-(4-methylphenyl)-5,6,7,8-tetrahydro-6-methyl-2-phenylpyrido[4,3-d]pyrimidine (3a)

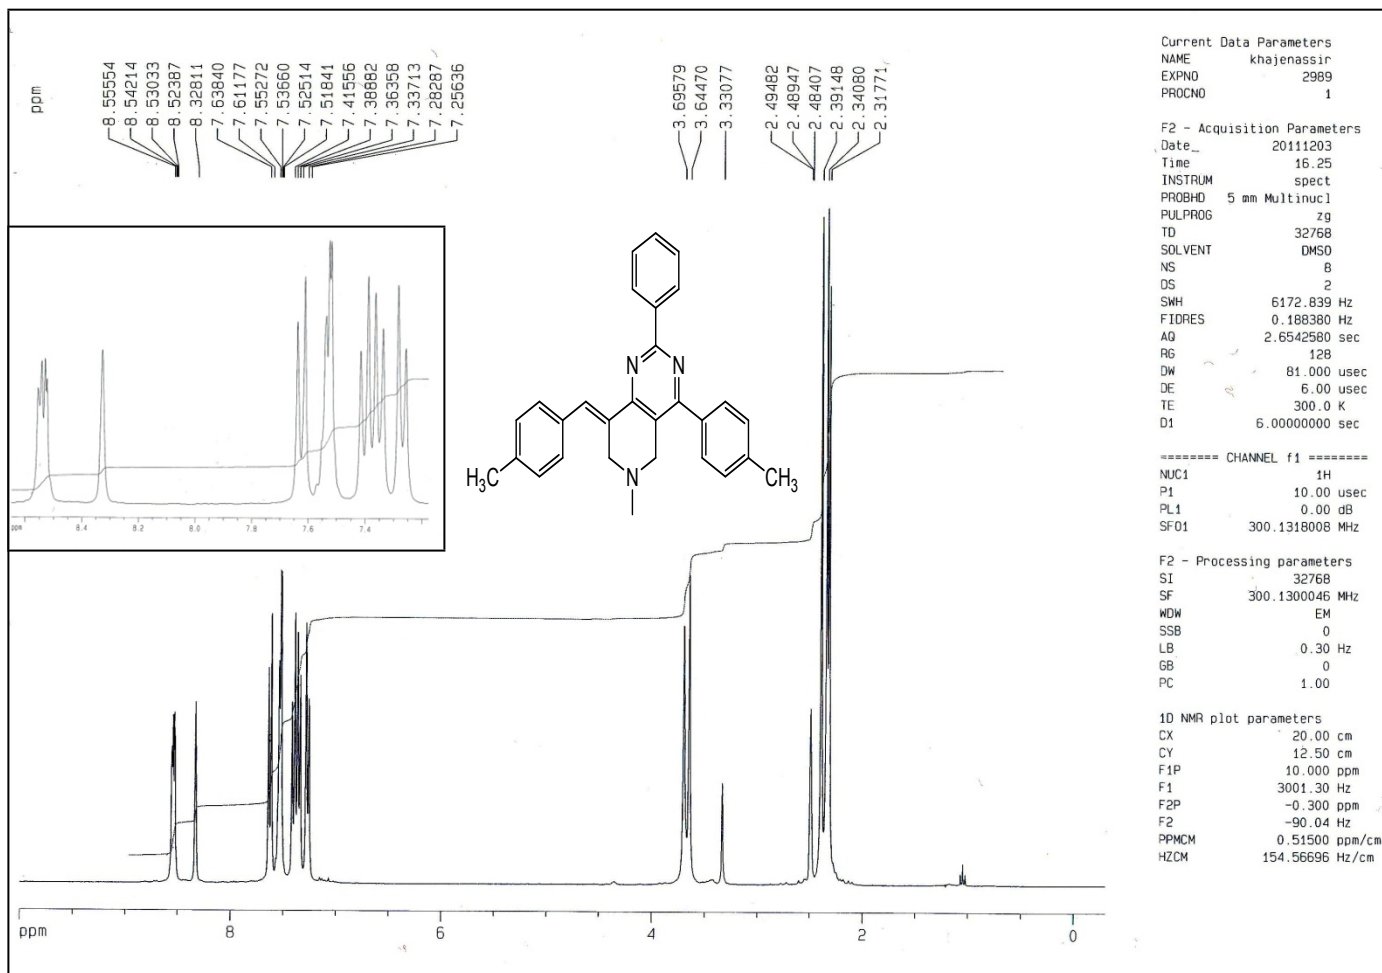

Fig S2:  $^1\text{H}$  NMR (300 MHz,  $\text{DMSO-}d_6$ ) spectra of (E)-8-(4-methylbenzylidene)-4-(4-methylphenyl)-5,6,7,8-tetrahydro-6-methyl-2-phenylpyrido[4,3-d]pyrimidine (3a)

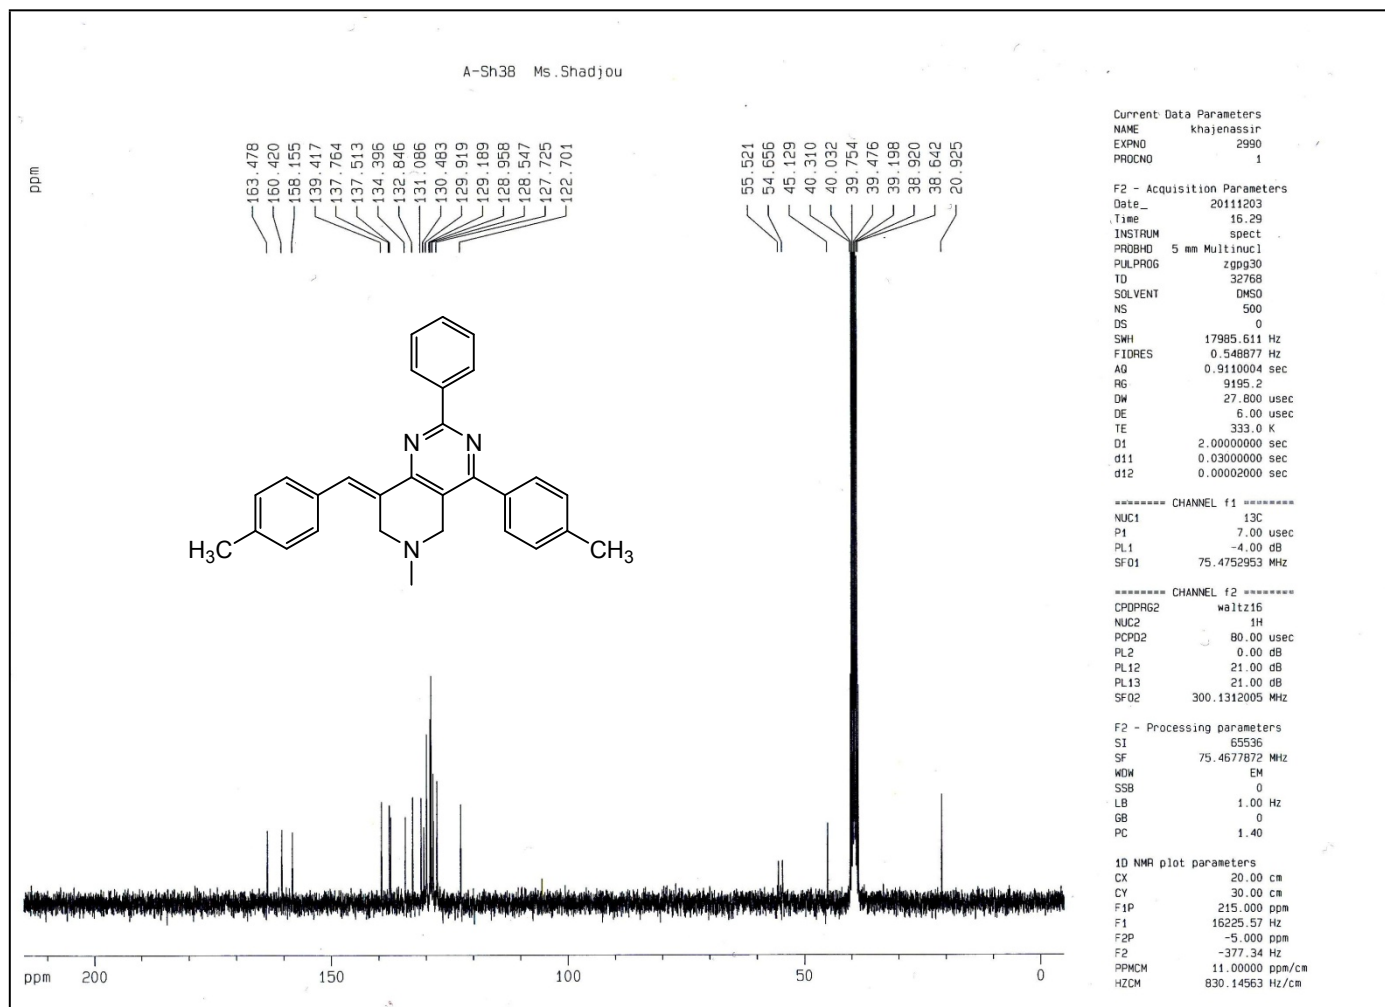

Fig S3:  $^{13}\text{C}$  NMR (75 MHz,  $\text{DMSO-}d_6$ ) spectra of (E)-8-(4-methylbenzylidene)-4-(4-methylphenyl)-5,6,7,8-tetrahydro-6-methyl-2-phenylpyrido[4,3-d]pyrimidine (3a)

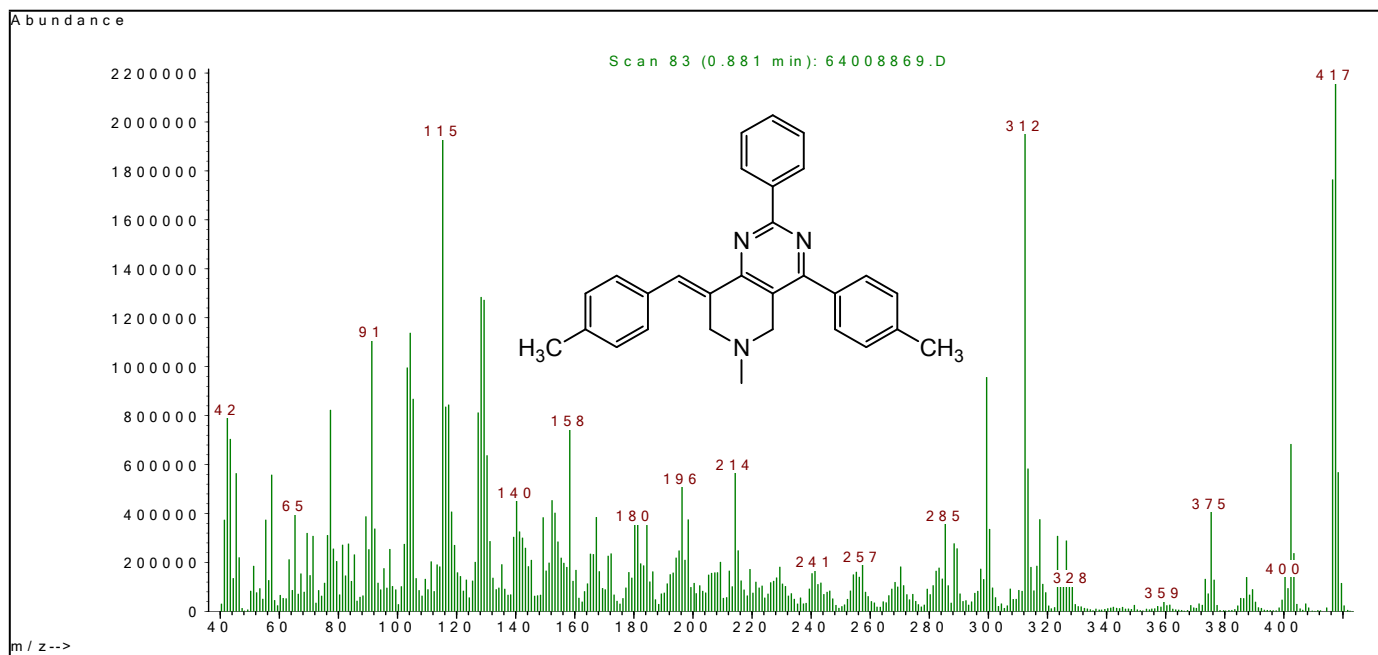

Fig S4: MS (EI) spectra of (E)-8-(4-methylbenzylidene)-4-(4-methylphenyl)-5,6,7,8-tetrahydro-6-methyl-2-phenylpyrido[4,3-d]pyrimidine (3a)

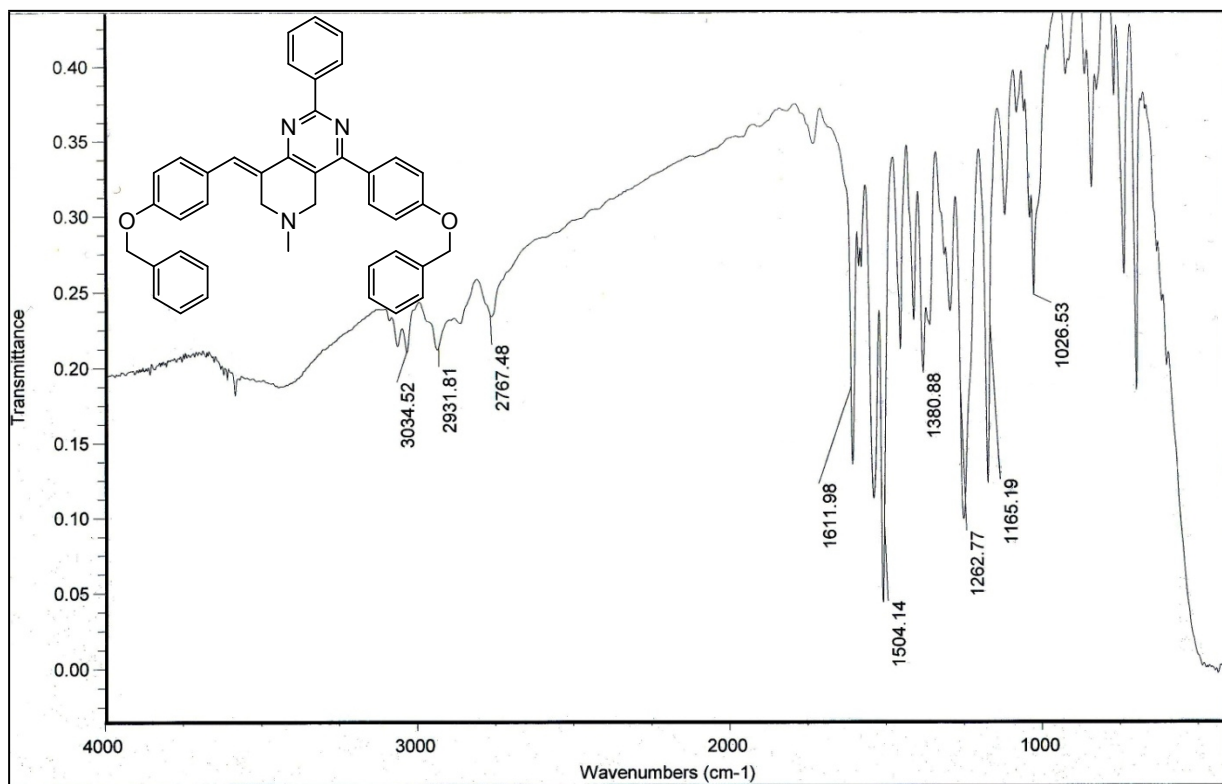

Fig S5: Ft-IR spectra of (E)-8-(4-(benzyloxy)benzylidene)-4-(4-(benzyloxy)phenyl)-5,6,7,8-tetrahydro-6-methyl-2-phenylpyrido[4,3-d]pyrimidine (3b)

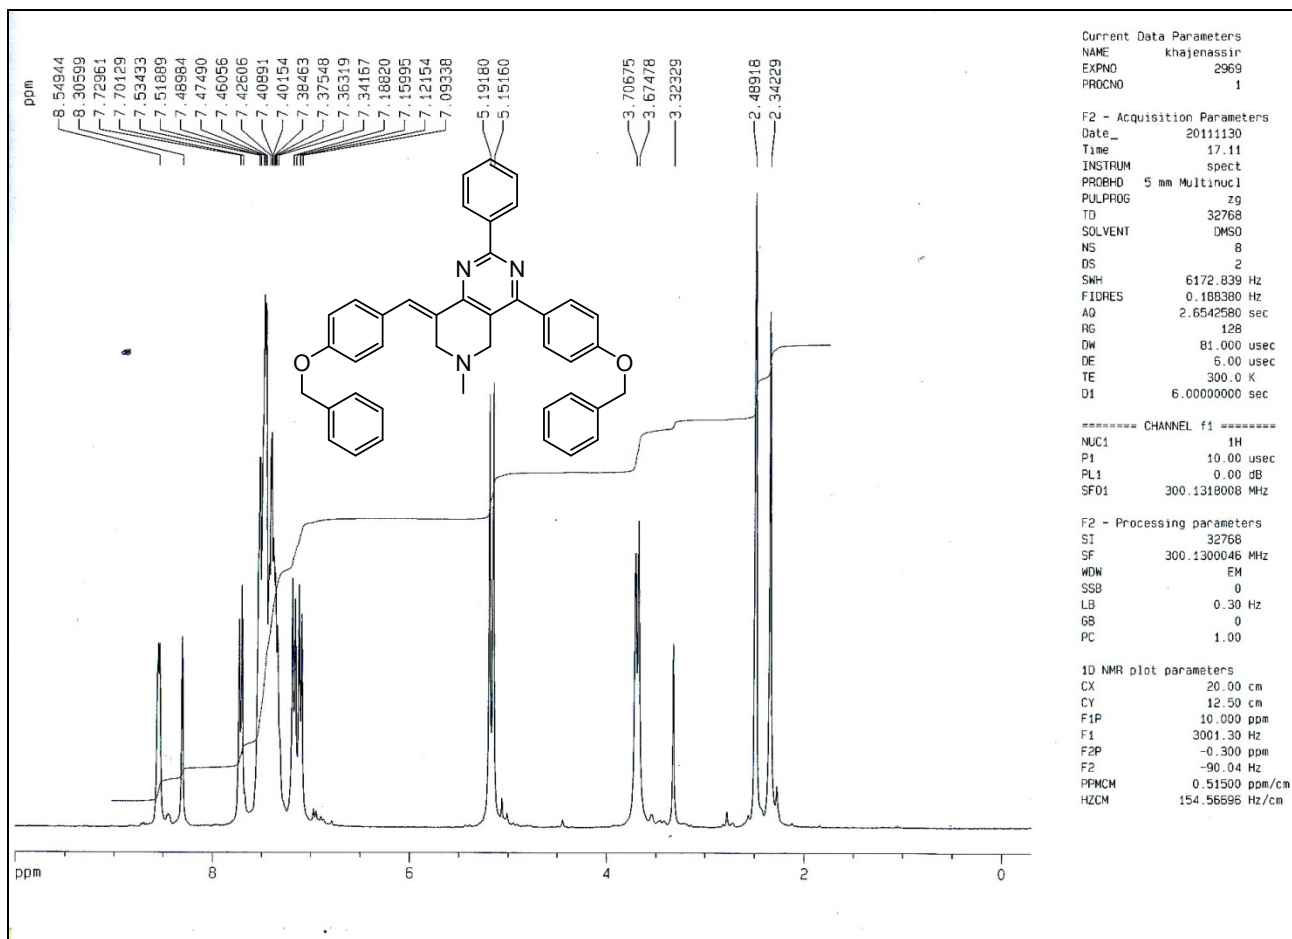

Fig S6:  $^1\text{H}$  NMR (300 MHz,  $\text{DMSO-}d_6$ ) spectra of (E)-8-(4-(benzyloxy)benzylidene)-4-(4-(benzyloxy)phenyl)-5,6,7,8-tetrahydro-6-methyl-2-phenylpyrido[4,3-d]pyrimidine (3b)



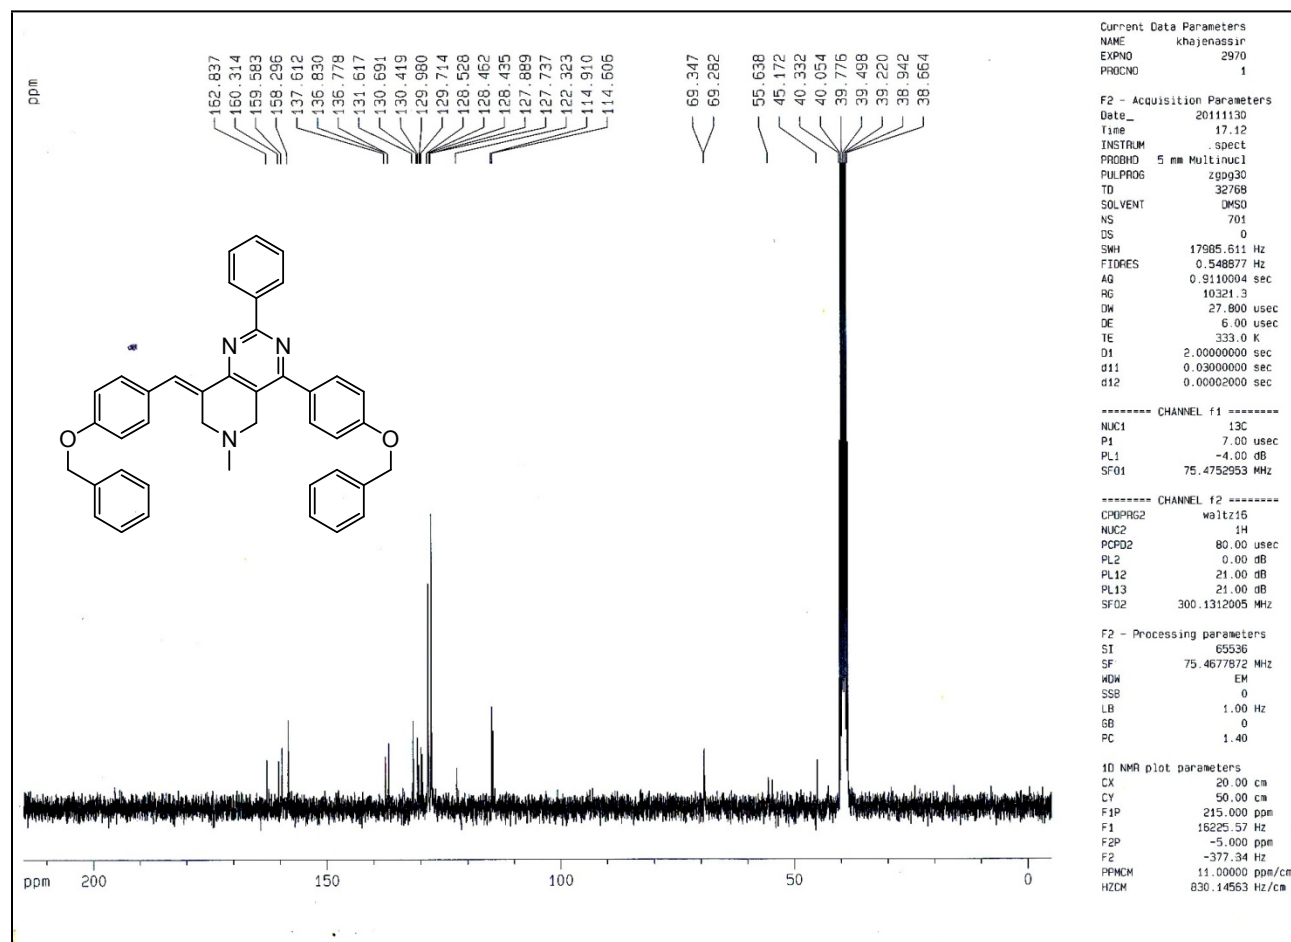

Fig S7:  $^{13}\text{C}$  NMR (75 MHz,  $\text{DMSO-}d_6$ ) spectra of (E)-8-(4-(benzyloxy)benzylidene)-4-(4-(benzyloxy)phenyl)-5,6,7,8-tetrahydro-6-methyl-2-phenylpyrido[4,3-d]pyrimidine (3b)

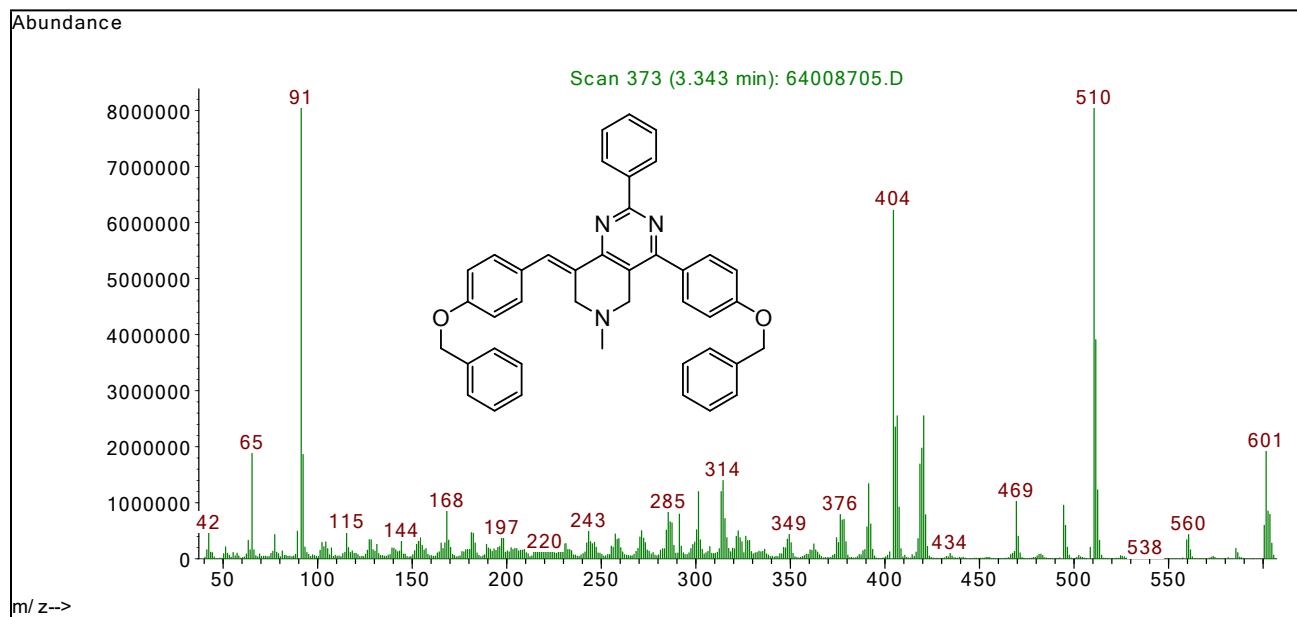

Fig S8: MS (EI) spectra of (E)-8-(4-(benzyloxy)benzylidene)-4-(4-(benzyloxy)phenyl)-5,6,7,8-tetrahydro-6-methyl-2-phenylpyrido[4,3-d]pyrimidine (3b)

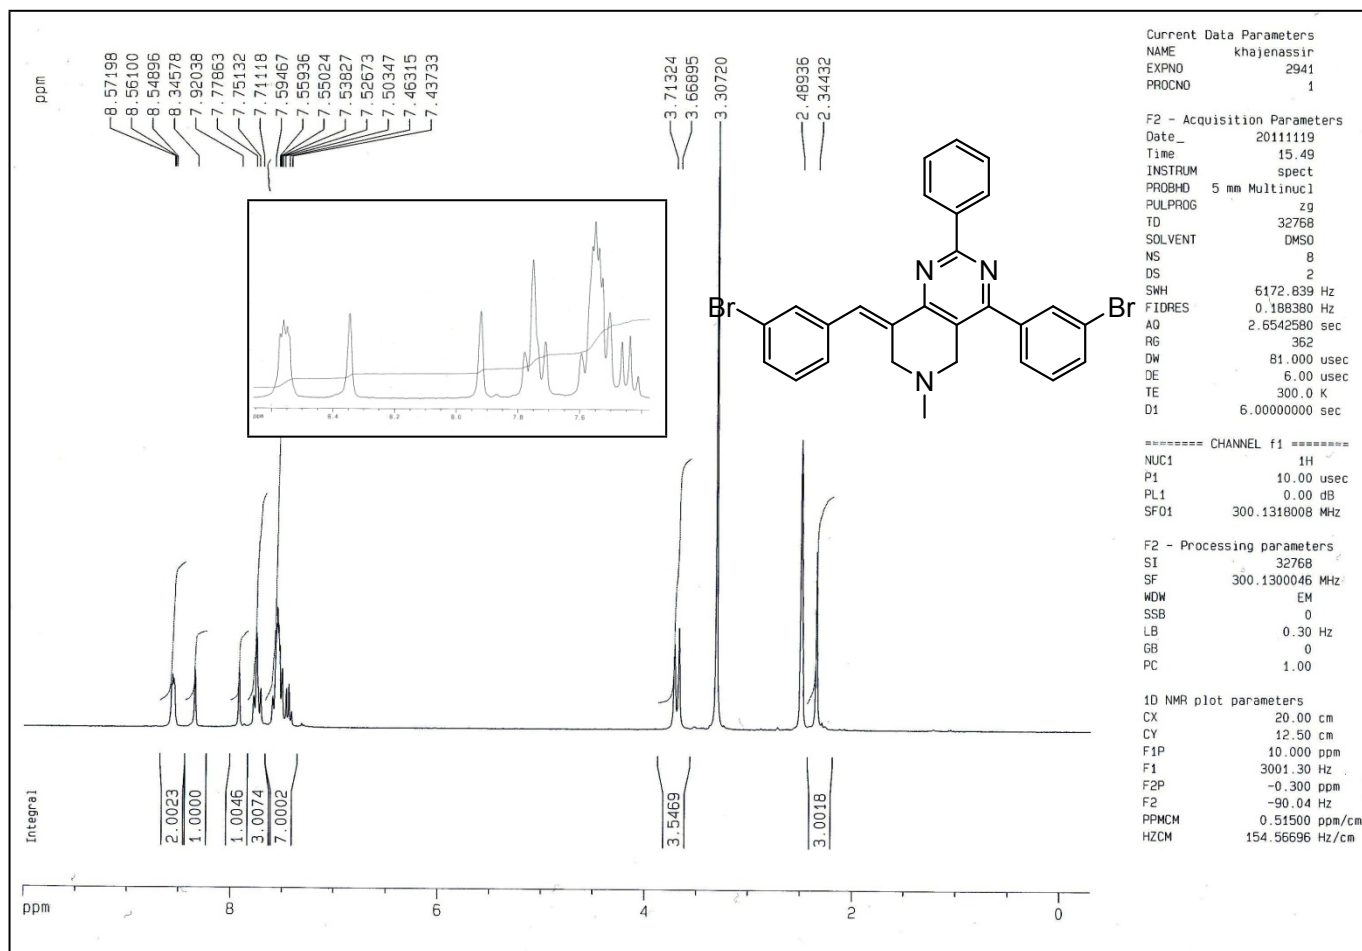

Fig S9:  $^1\text{H}$  NMR (300 MHz,  $\text{DMSO-}d_6$ ) spectra of (E)-8-(3-bromobenzylidene)-4-(3-bromophenyl)-5,6,7,8-tetrahydro-6-methyl-2-phenylpyrido[4,3-d]pyrimidine (3c)

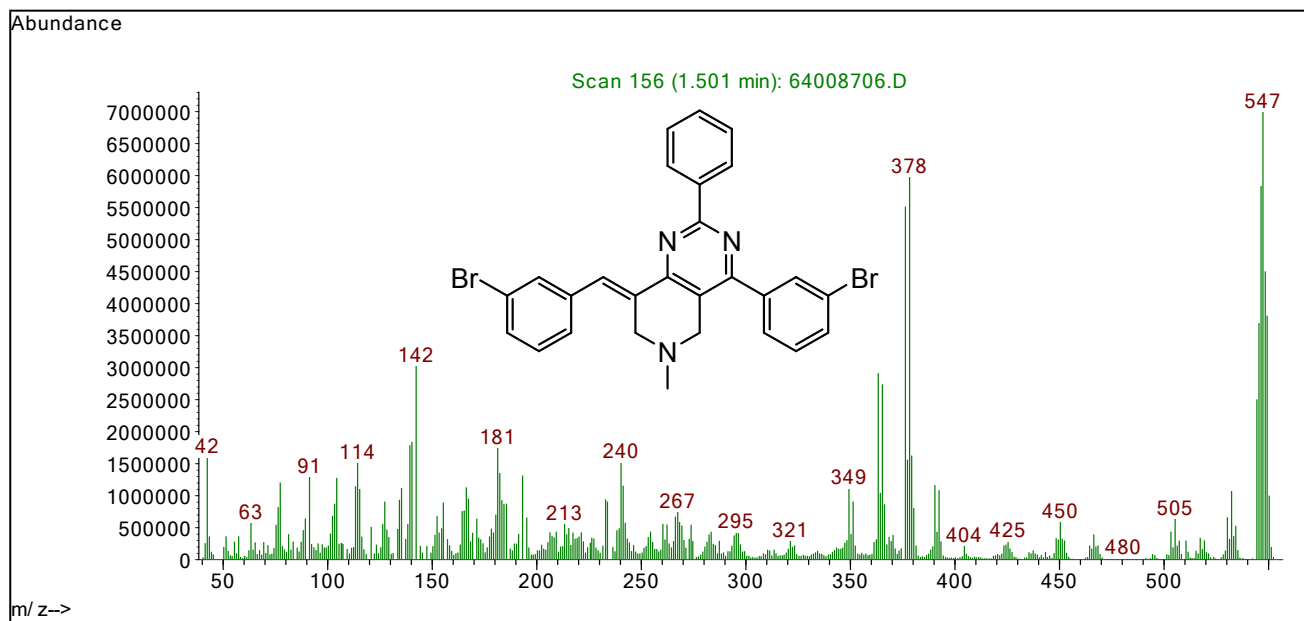

Fig S10: MS (EI) spectra of (E)-8-(3-bromobenzylidene)-4-(3-bromophenyl)-5,6,7,8-tetrahydro-6-methyl-2-phenylpyrido[4,3-d]pyrimidine (3c)

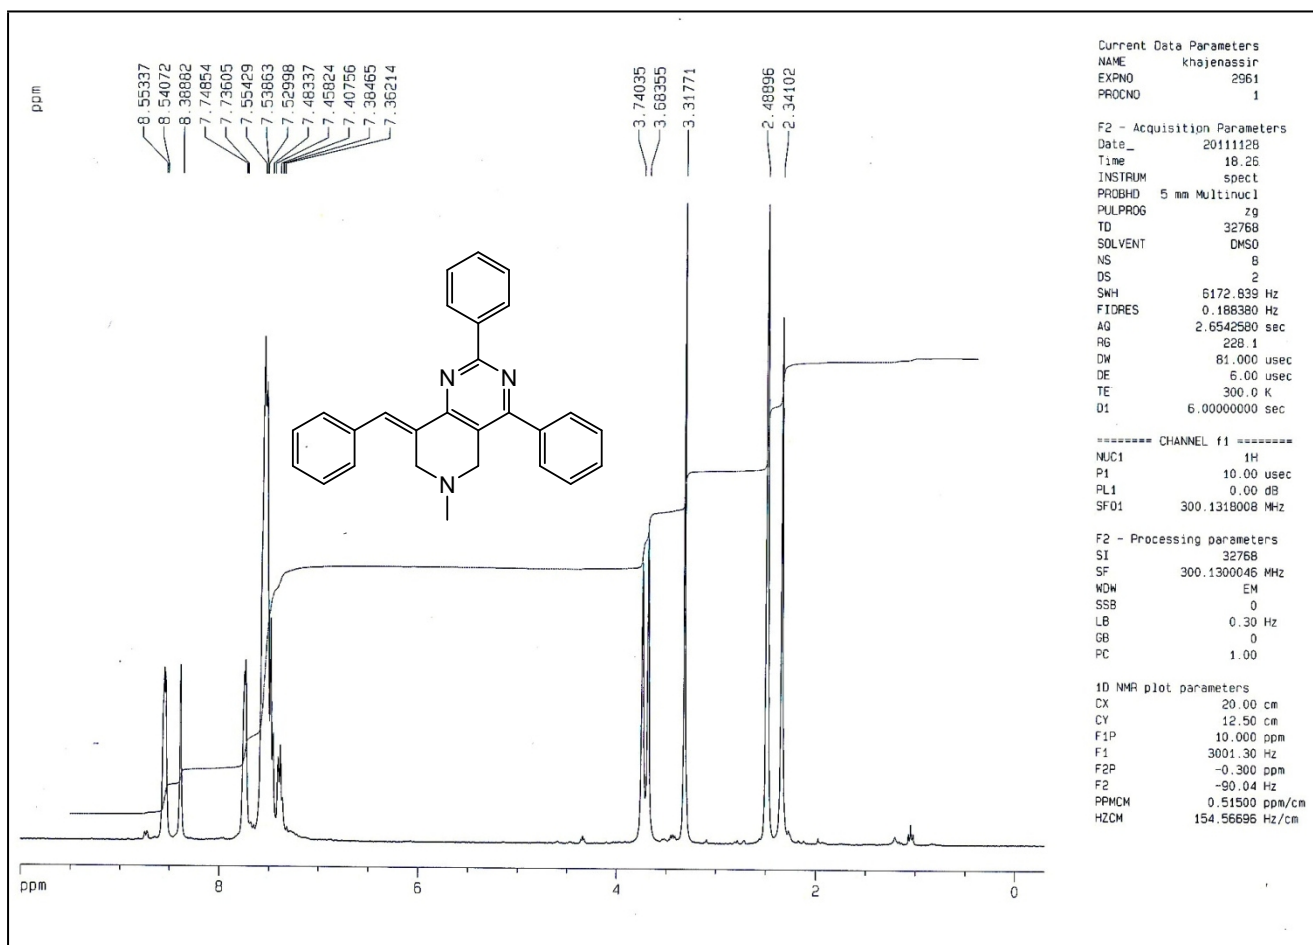

Fig S11:  $^1\text{H}$  NMR (300 MHz,  $\text{DMSO-}d_6$ ) spectra of (E)-8-benzylidene-5,6,7,8-tetrahydro-6-methyl-2,4-diphenylpyrido[4,3-d]pyrimidine (3d)

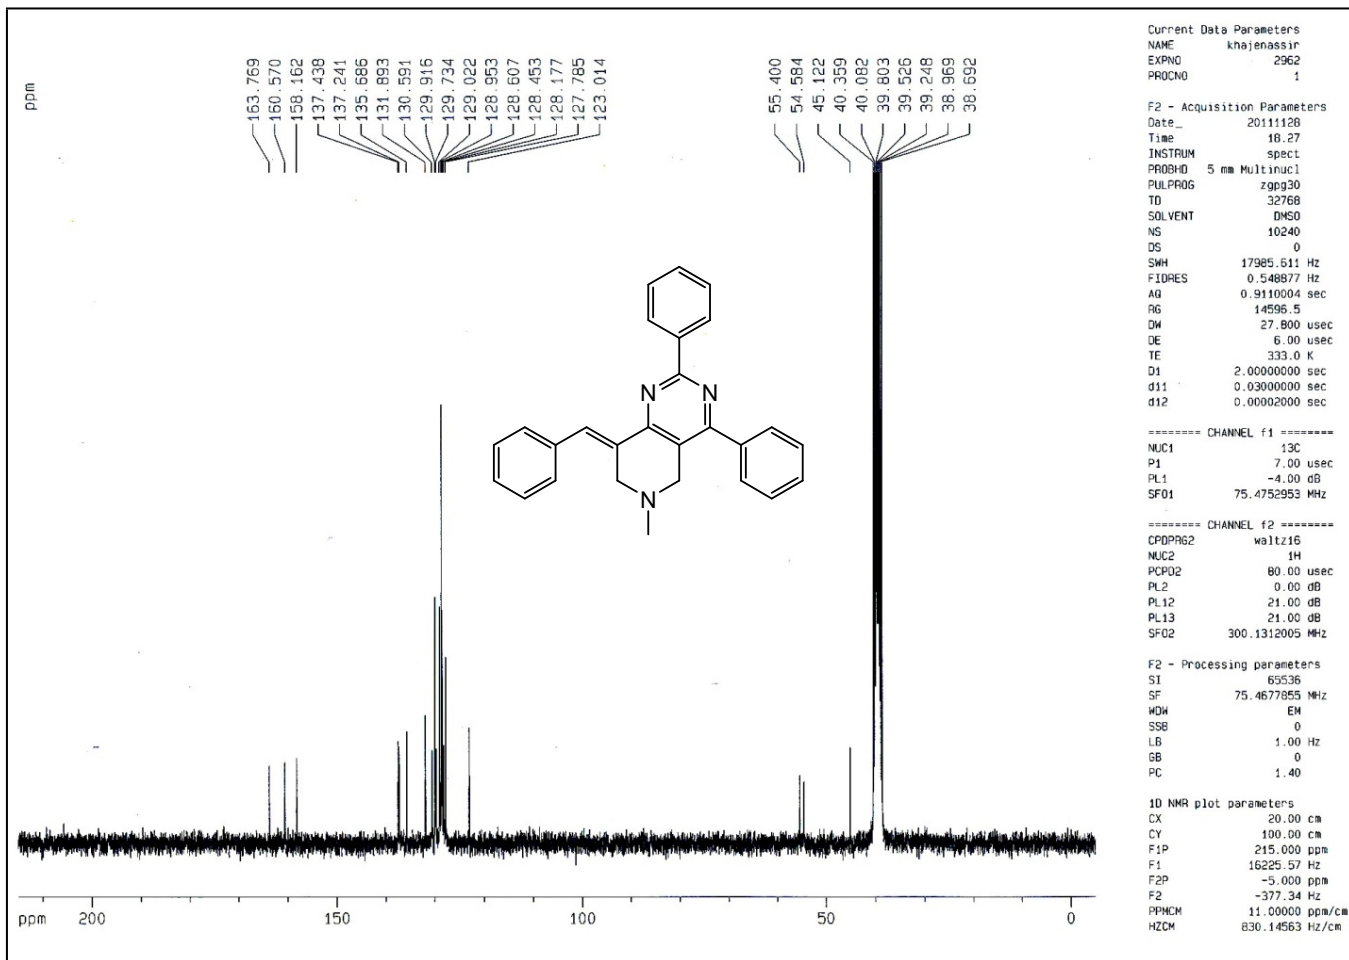

Fig S12:  $^{13}\text{C}$  NMR (75 MHz,  $\text{DMSO-}d_6$ ) spectra of (E)-8-benzylidene-5,6,7,8-tetrahydro-6-methyl-2,4-diphenylpyrido[4,3-d]pyrimidine (3d)

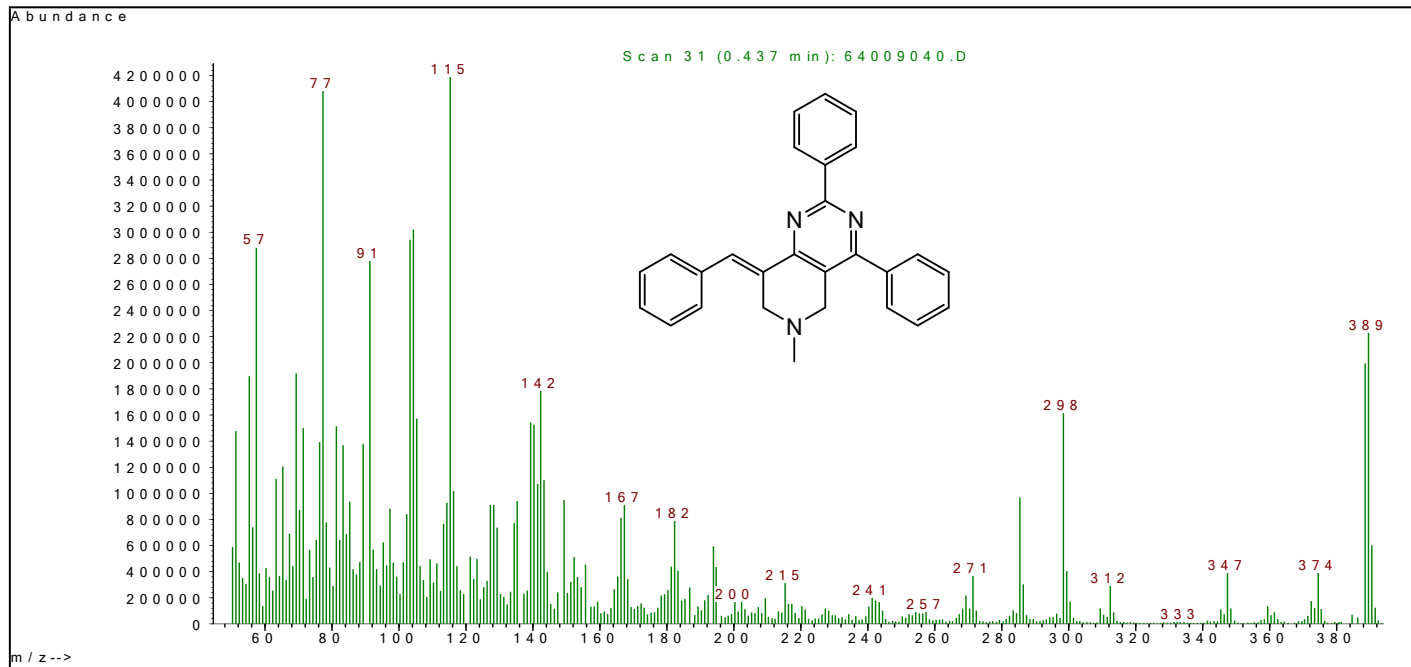

Fig S13: MS (EI) spectra of (E)-8-benzylidene-5,6,7,8-tetrahydro-6-methyl-2,4-diphenylpyrido[4,3-d]pyrimidine (3d)

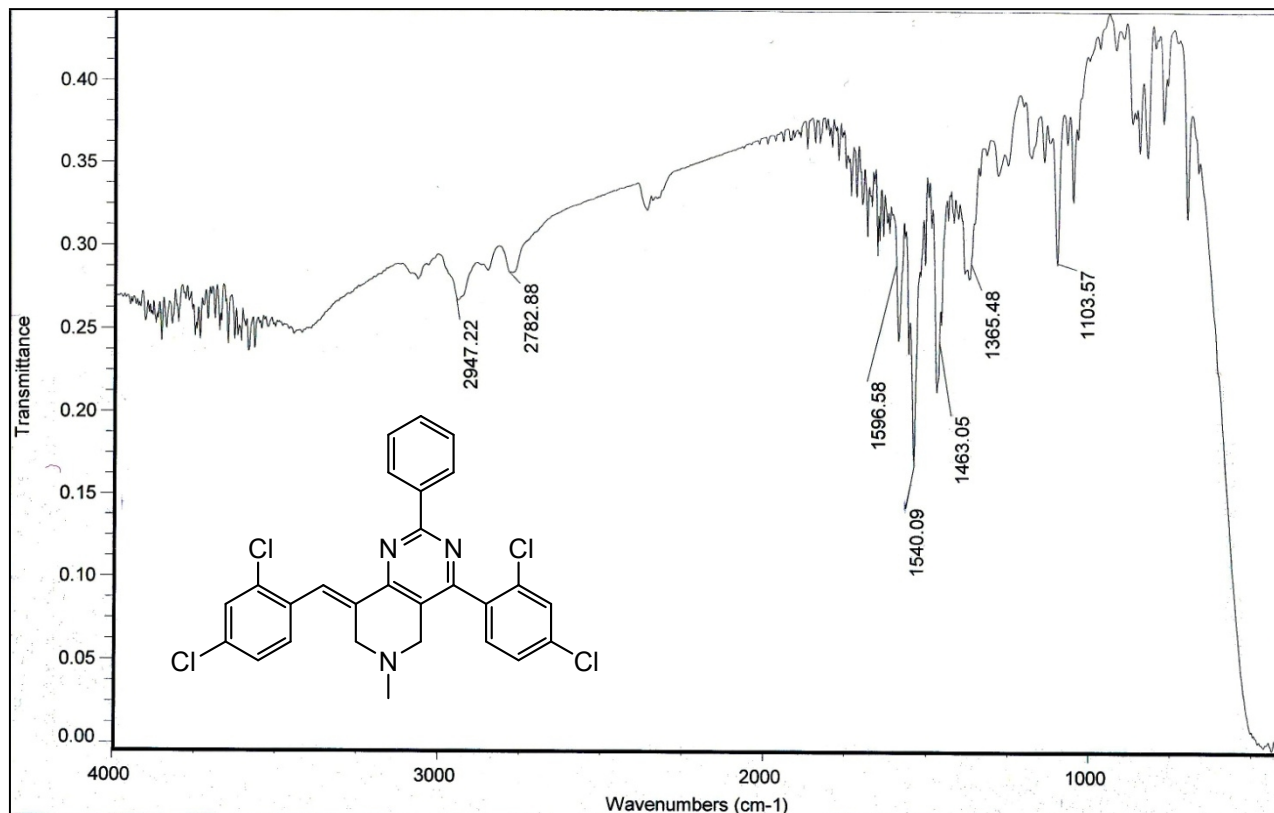

Fig S14: Ft-IR spectra of (E)-8-(2,4-dichlorobenzylidene)-4-(2,4-dichlorophenyl)-5,6,7,8-tetrahydro-6-methyl-2-phenylpyrido[4,3-d]pyrimidine (3e)



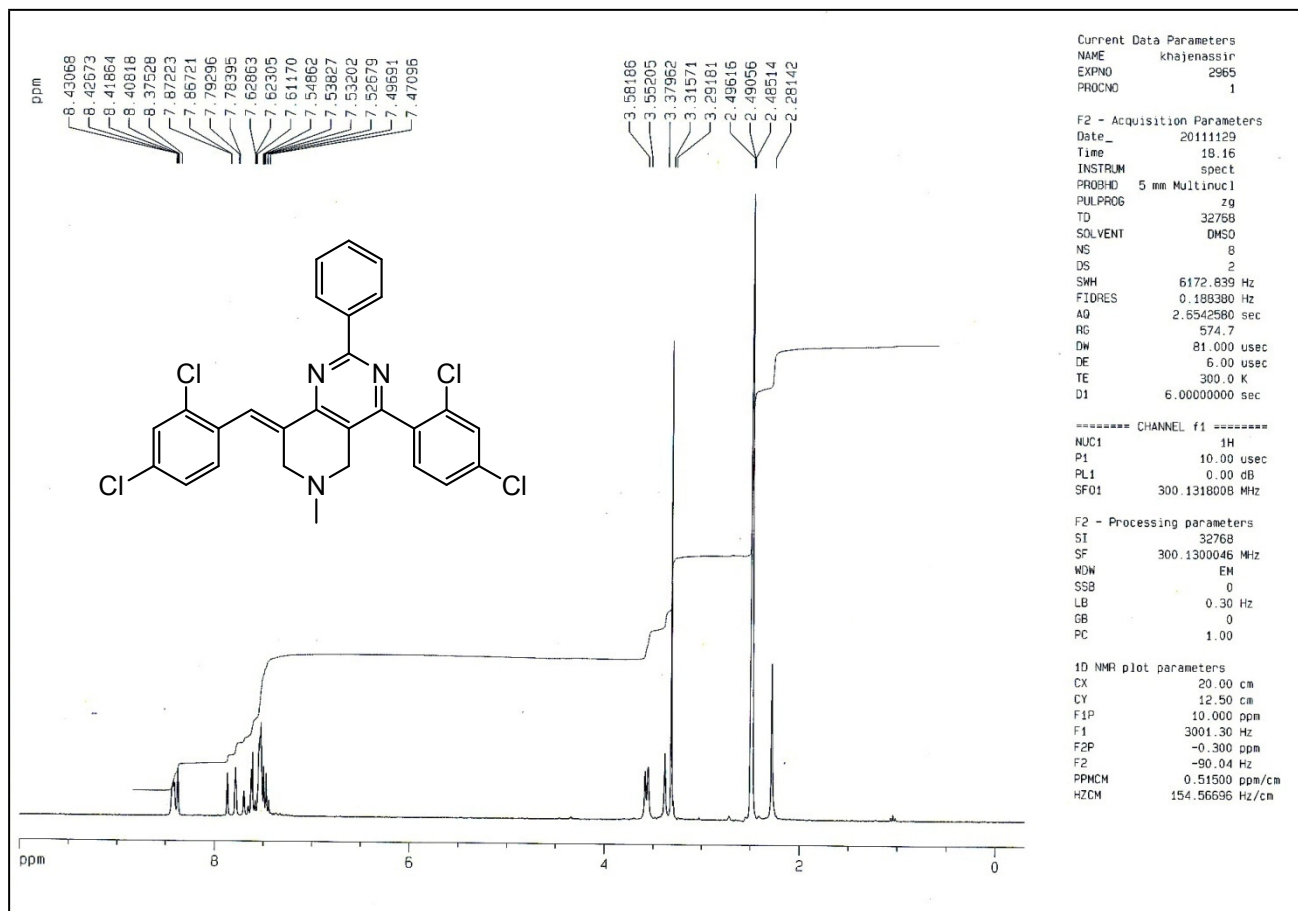

Fig S15:  $^1\text{H}$  NMR (300 MHz,  $\text{DMSO-}d_6$ ) spectra of (E)-8-(2,4-dichlorobenzylidene)-4-(2,4-dichlorophenyl)-5,6,7,8-tetrahydro-6-methyl-2-phenylpyrido[4,3-d]pyrimidine (3e)

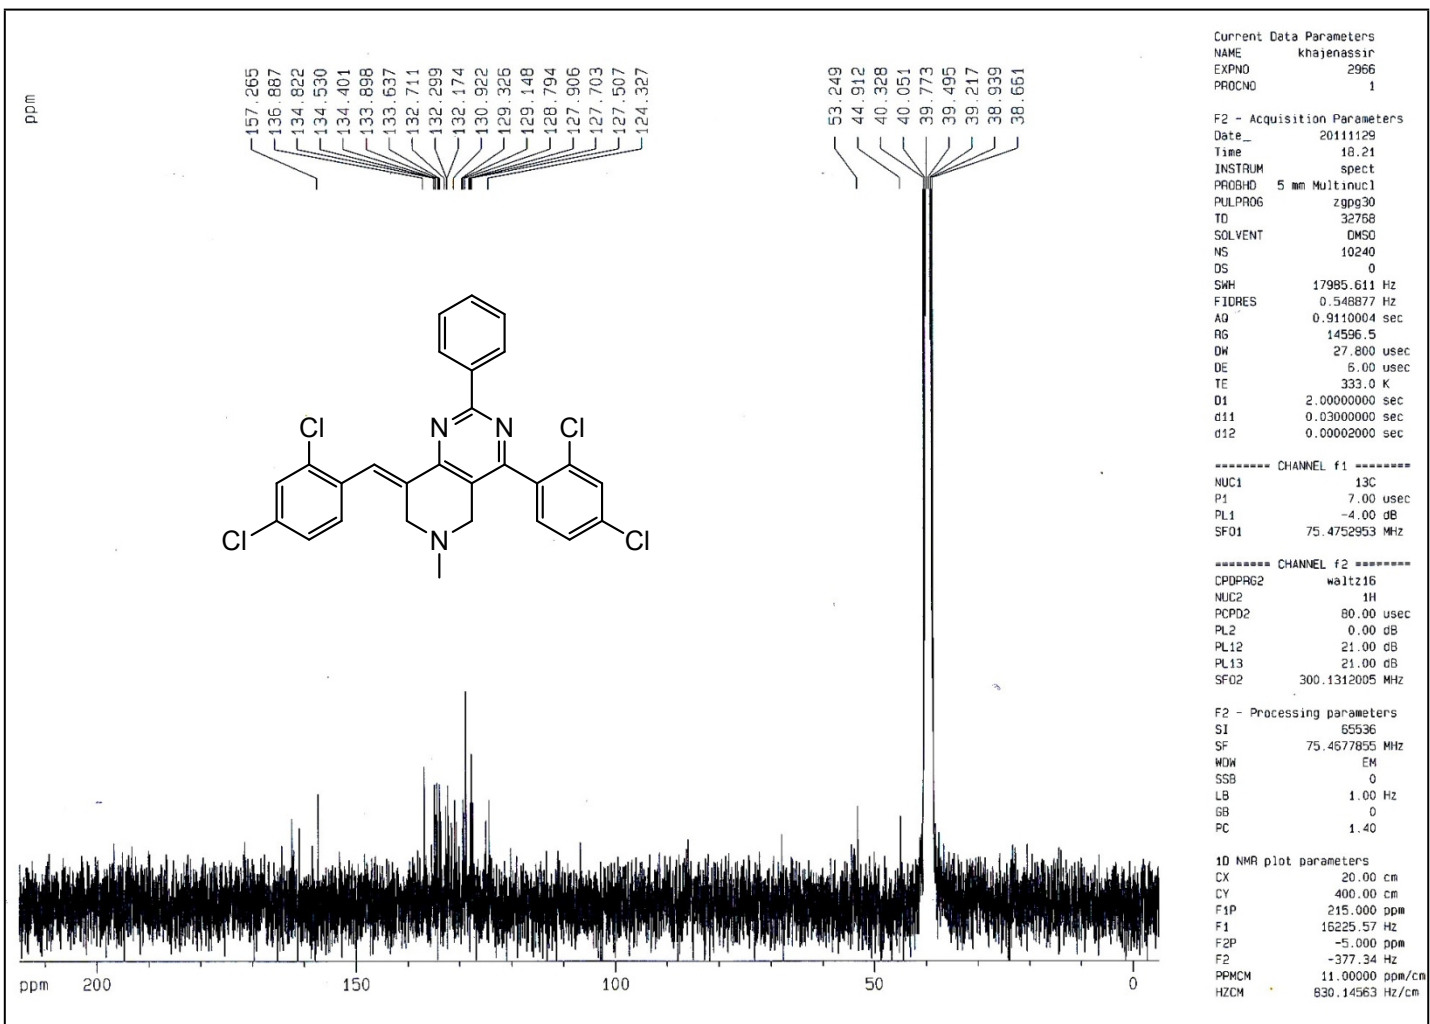

Fig S16:  $^{13}\text{C}$  NMR (75 MHz,  $\text{DMSO}-d_6$ ) spectra of (E)-8-(2,4-dichlorobenzylidene)-4-(2,4-dichlorophenyl)-5,6,7,8-tetrahydro-6-methyl-2-phenylpyrido[4,3-d]pyrimidine (3e)

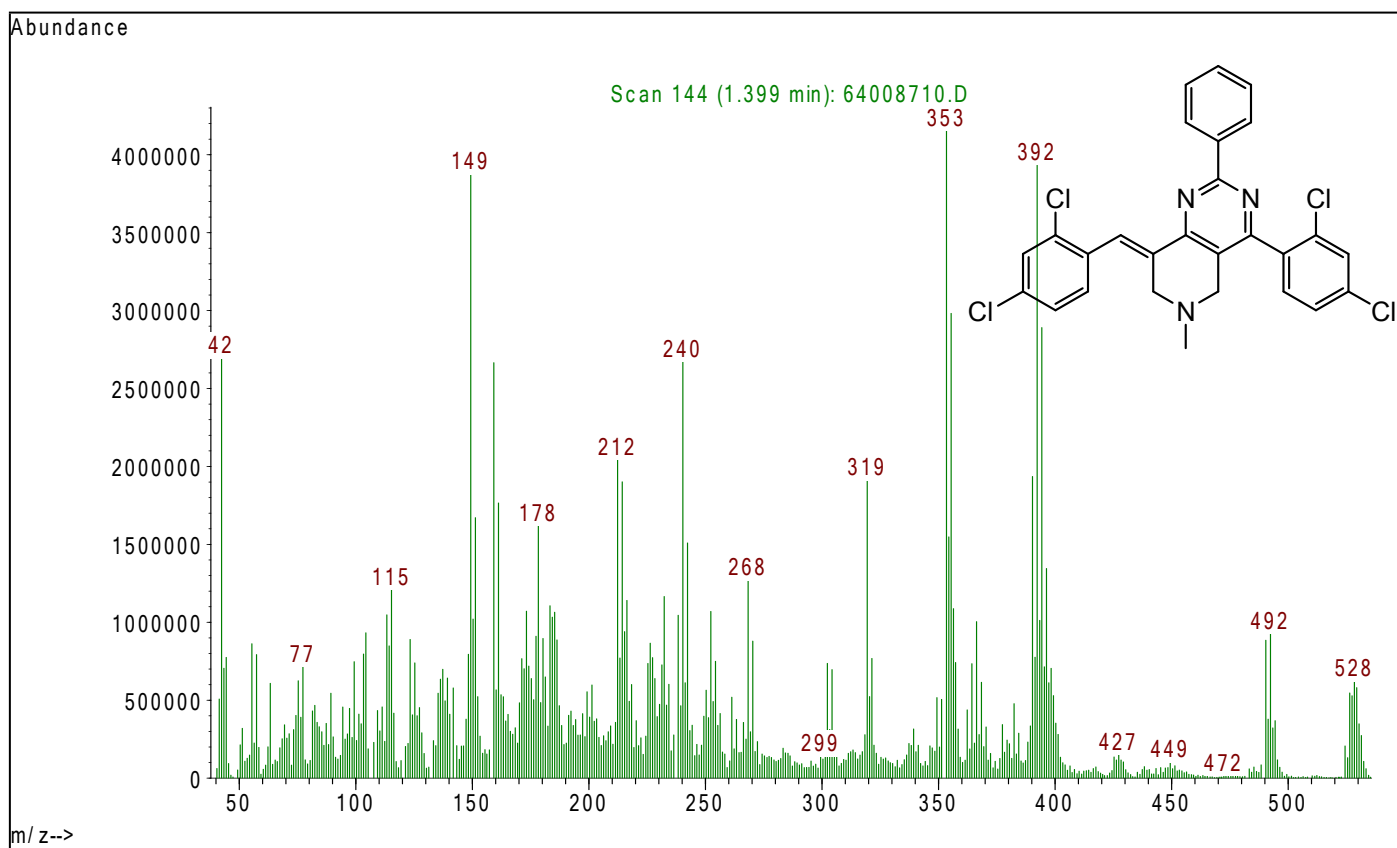

Fig S17: MS (EI) spectra of (E)-8-(2,4-dichlorobenzylidene)-4-(2,4-dichlorophenyl)-5,6,7,8-tetrahydro-6-methyl-2-phenylpyrido[4,3-d]pyrimidine (3e)

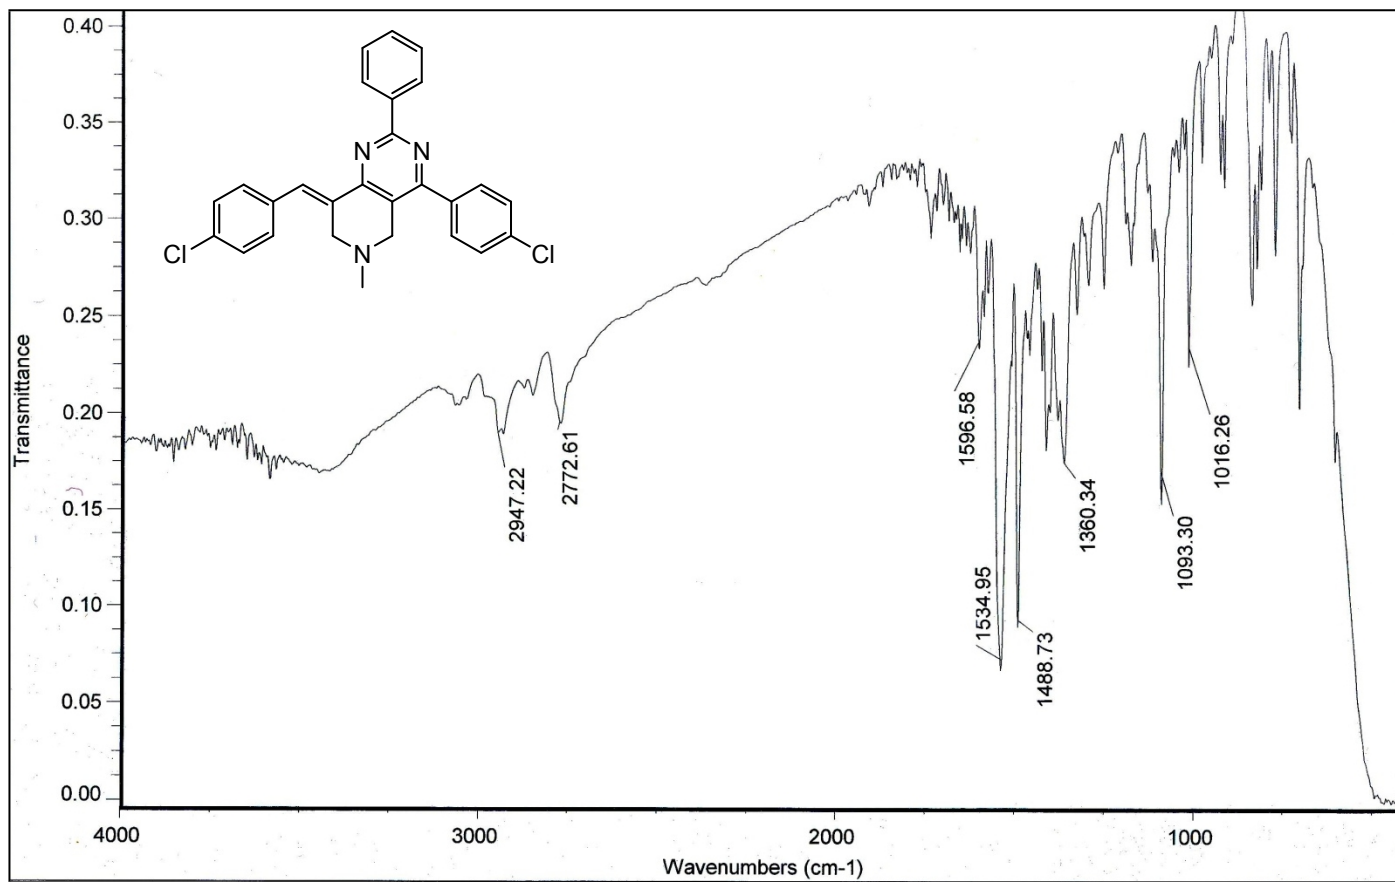

Fig S18: Ft-IR spectra of (E)-8-(4-chlorobenzylidene)-4-(4-chlorophenyl)-5,6,7,8-tetrahydro-6-methyl-2-phenylpyrido[4,3-d]pyrimidine (3f)

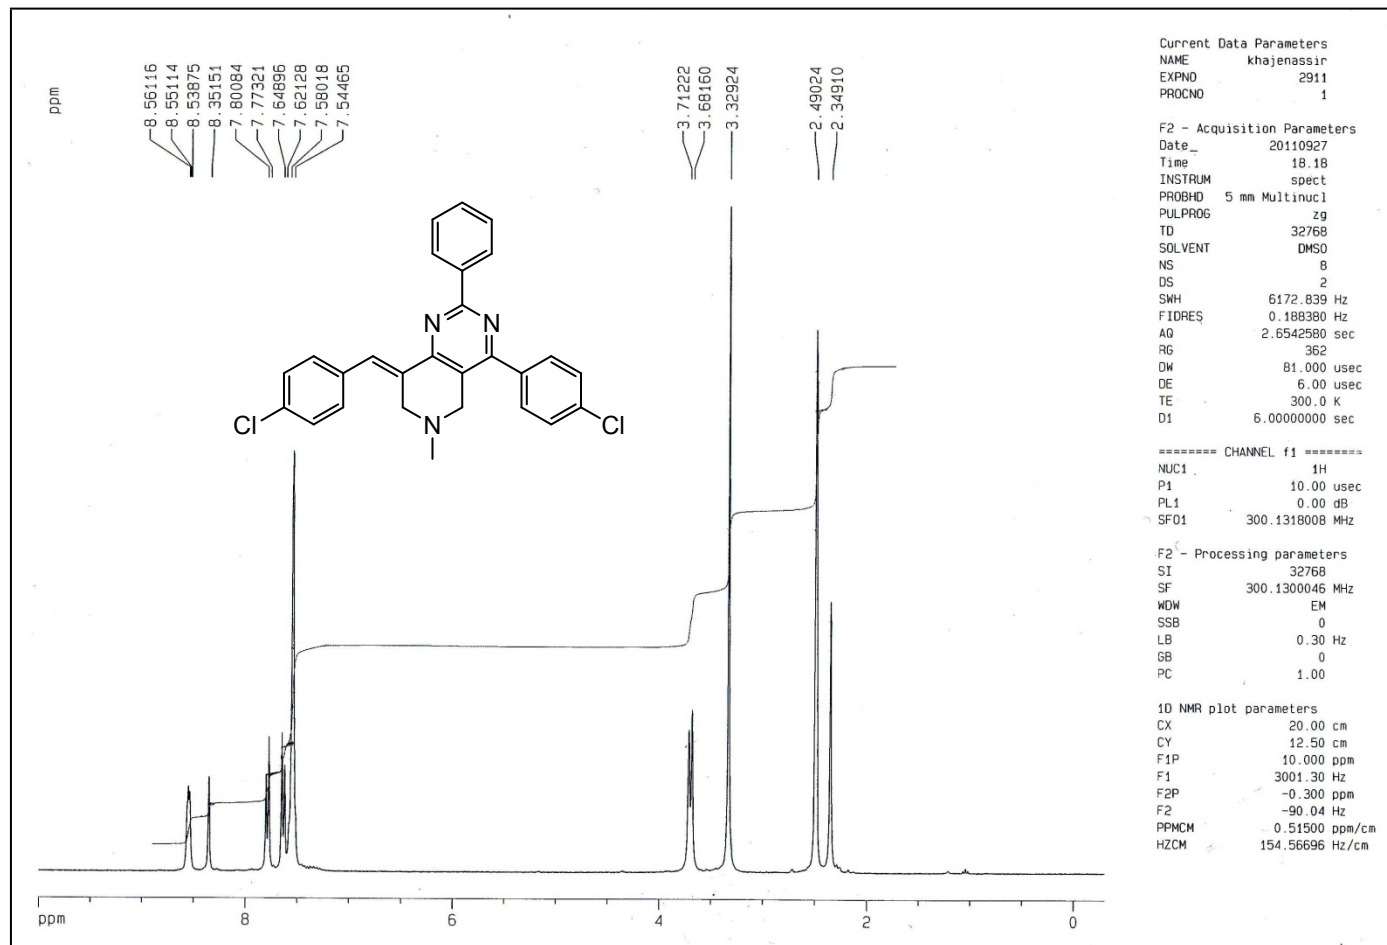

Fig S19:  $^1\text{H}$  NMR (300 MHz,  $\text{DMSO-}d_6$ ) spectra of (E)-8-(4-chlorobenzylidene)-4-(4-chlorophenyl)-5,6,7,8-tetrahydro-6-methyl-2-phenylpyrido[4,3-d]pyrimidine (3f)

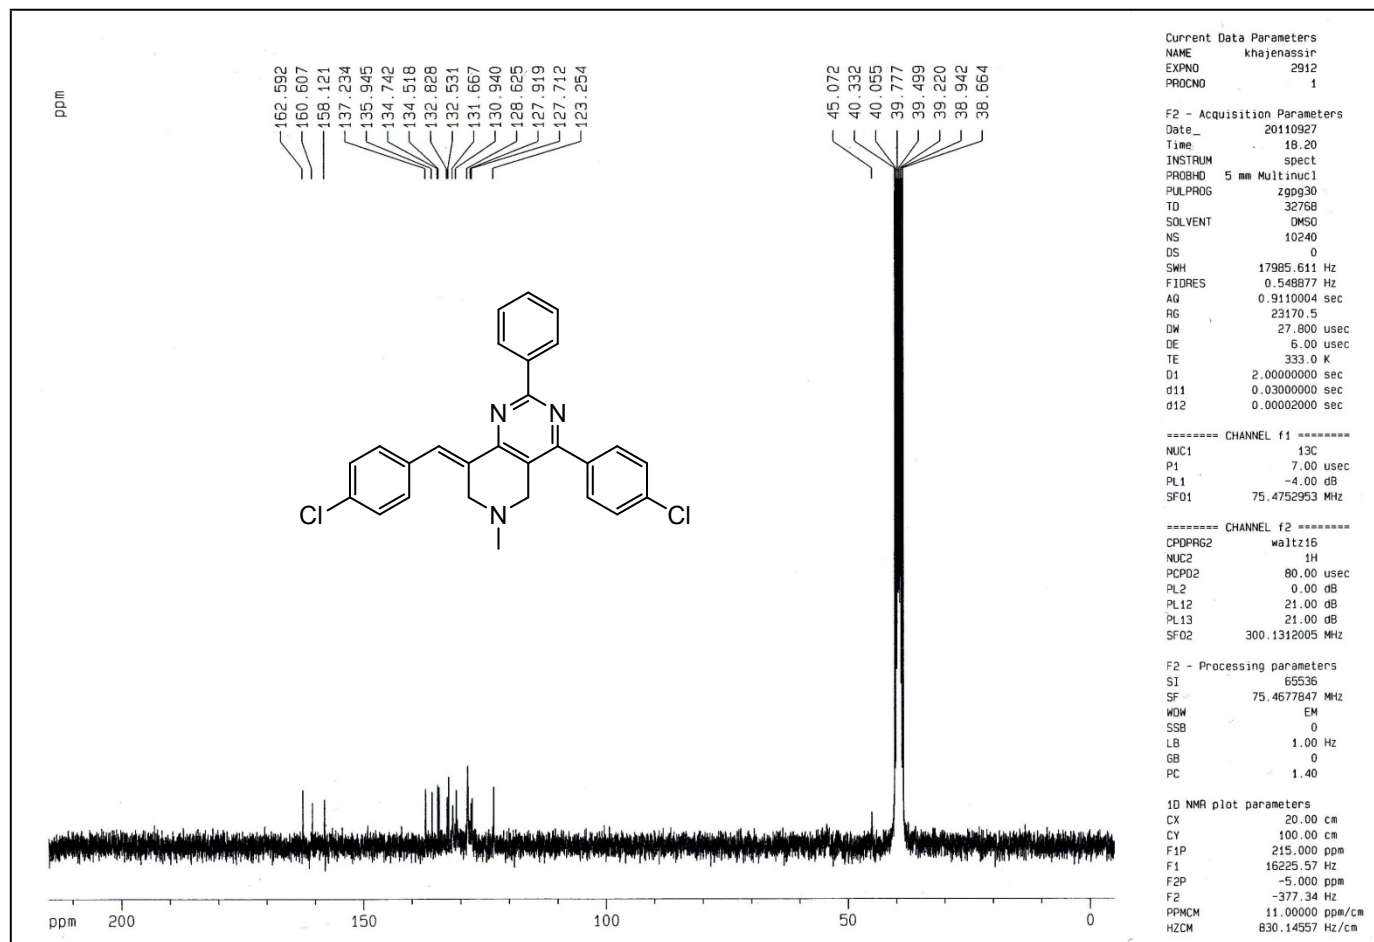

Fig S20:  $^{13}\text{C}$  NMR (75 MHz,  $\text{DMSO}-d_6$ ) spectra of (E)-8-(4-chlorobenzylidene)-4-(4-chlorophenyl)-5,6,7,8-tetrahydro-6-methyl-2-phenylpyrido[4,3-d]pyrimidine (3f)

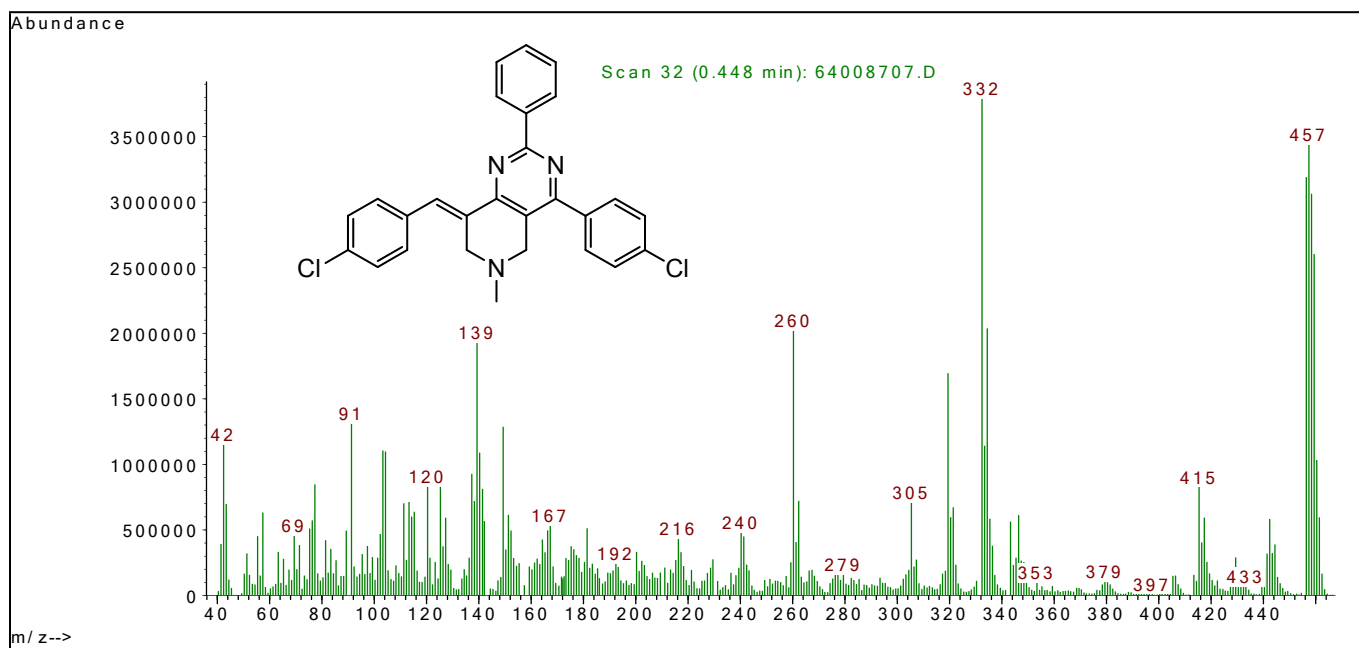

Fig S21: MS (EI) spectra of (E)-8-(4-chlorobenzylidene)-4-(4-chlorophenyl)-5,6,7,8-tetrahydro-6-methyl-2-phenylpyrido[4,3-d]pyrimidine (3f)

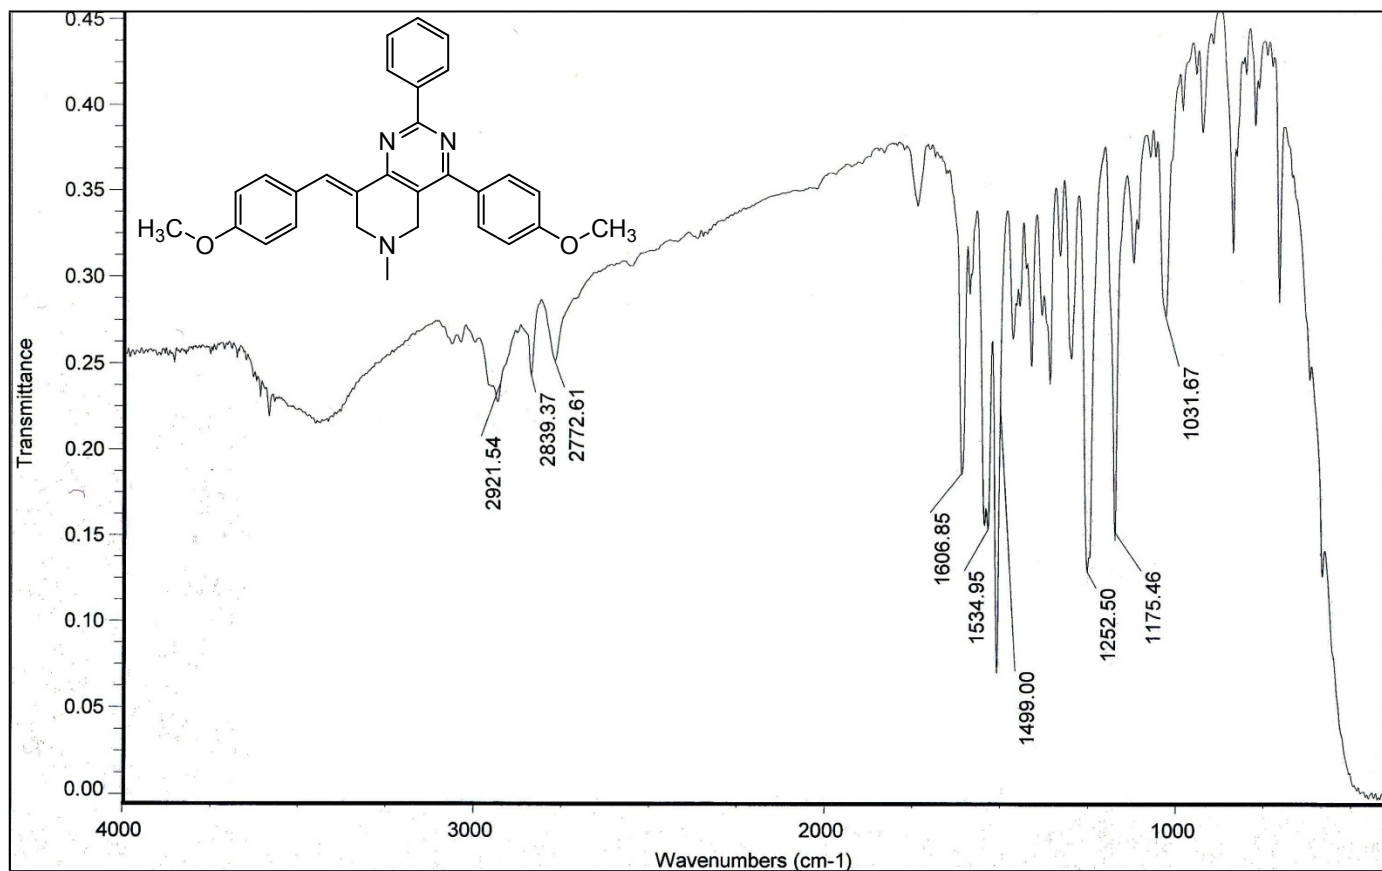

Fig S22: Ft-IR spectra of (E)-8-(4-methoxybenzylidene)-5,6,7,8-tetrahydro-4-(4-methoxyphenyl)-6-methyl-2-phenylpyrido[4,3-d]pyrimidine (3g)



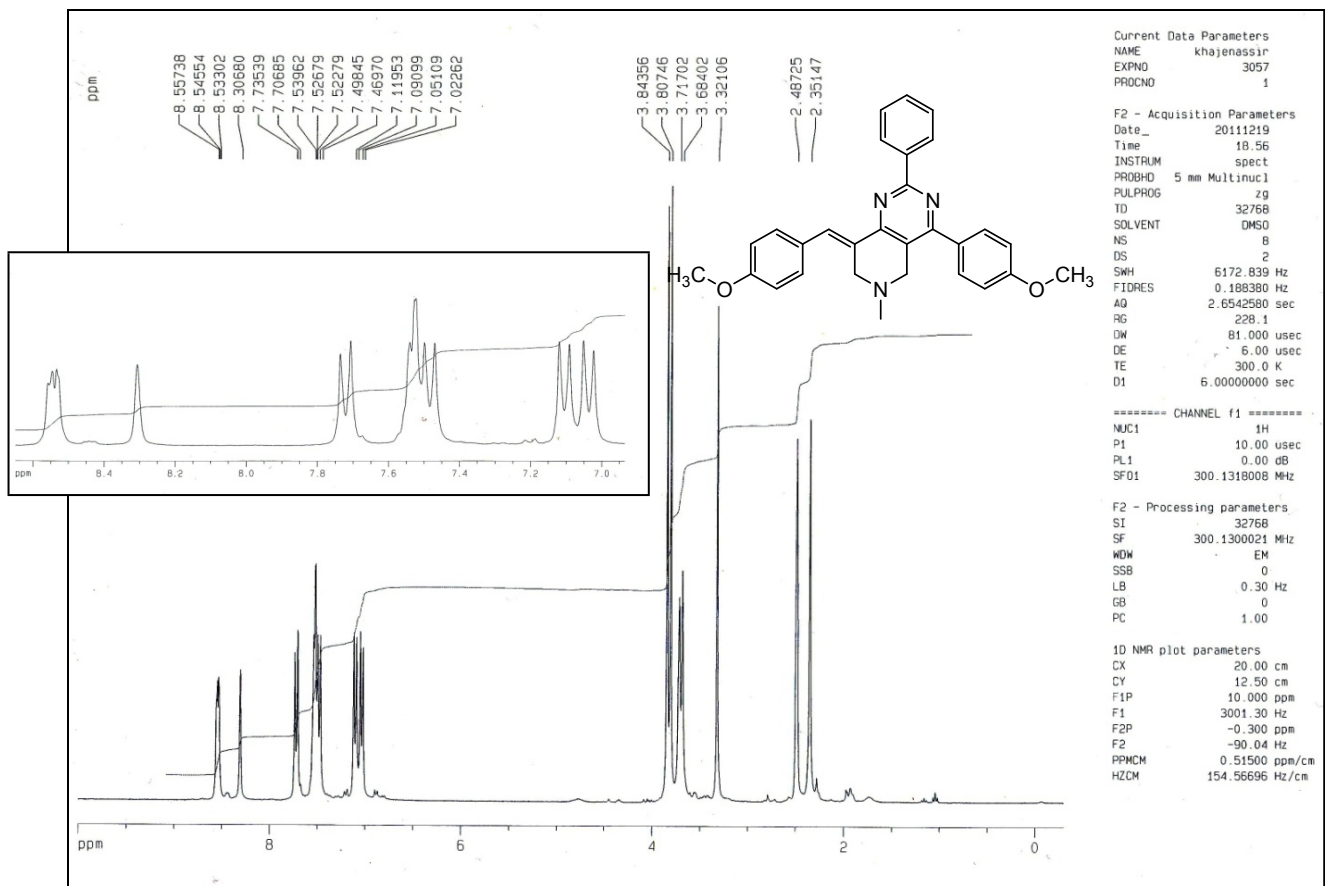

Fig S23:  $^1\text{H}$  NMR (300 MHz,  $\text{DMSO-}d_6$ ) spectra of (E)-8-(4-methoxybenzylidene)-5,6,7,8-tetrahydro-4-(4-methoxyphenyl)-6-methyl-2-phenylpyrido[4,3-d]pyrimidine (3g)

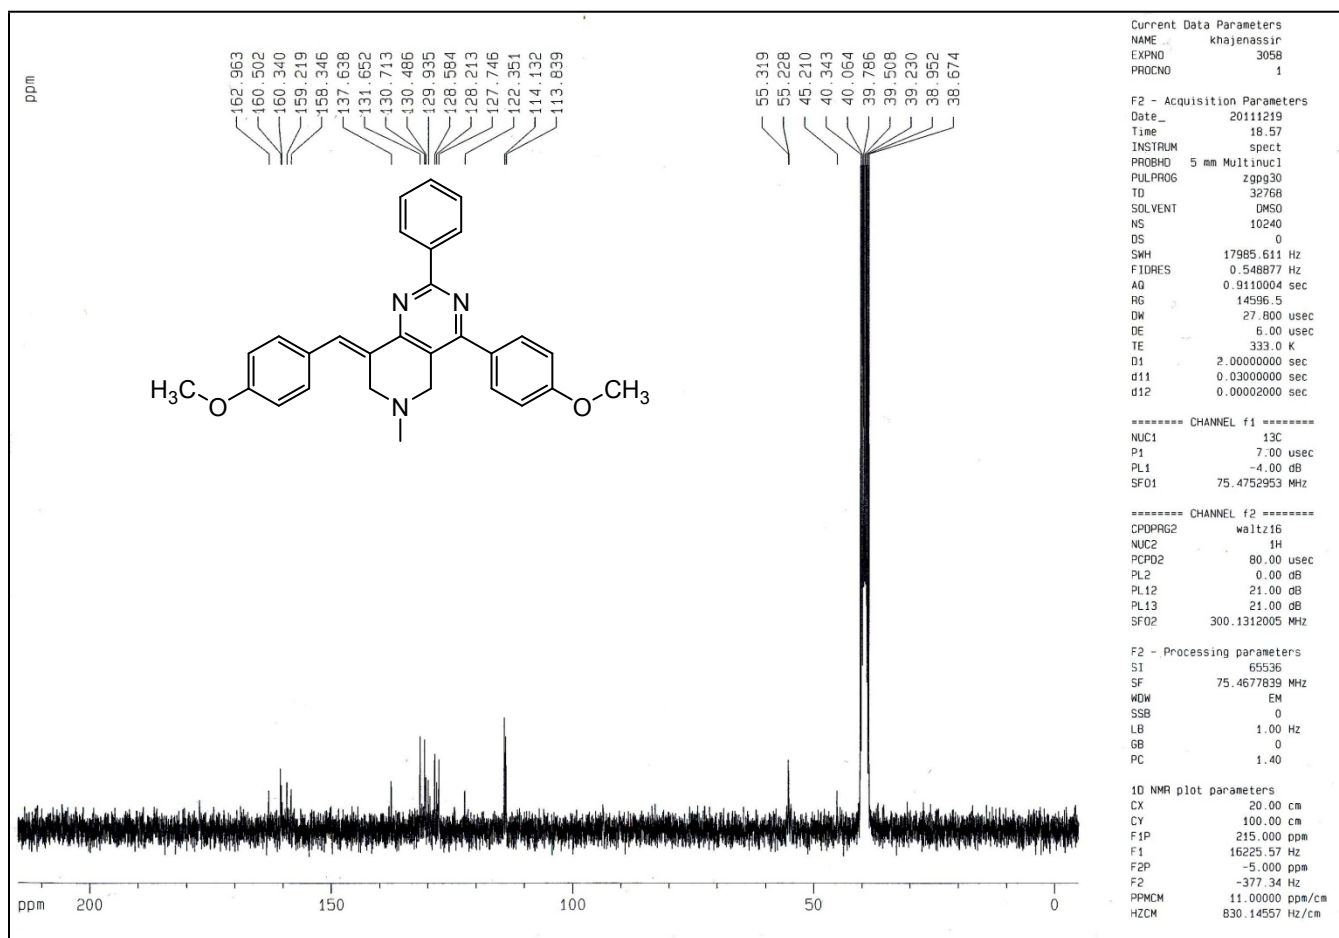

Fig S24: <sup>13</sup>C NMR (75 MHz, DMSO-*d*<sub>6</sub>) spectra of (E)-8-(4-methoxybenzylidene)-5,6,7,8-tetrahydro-4-(4-methoxyphenyl)-6-methyl-2-phenylpyrido[4,3-d]pyrimidine (3g)

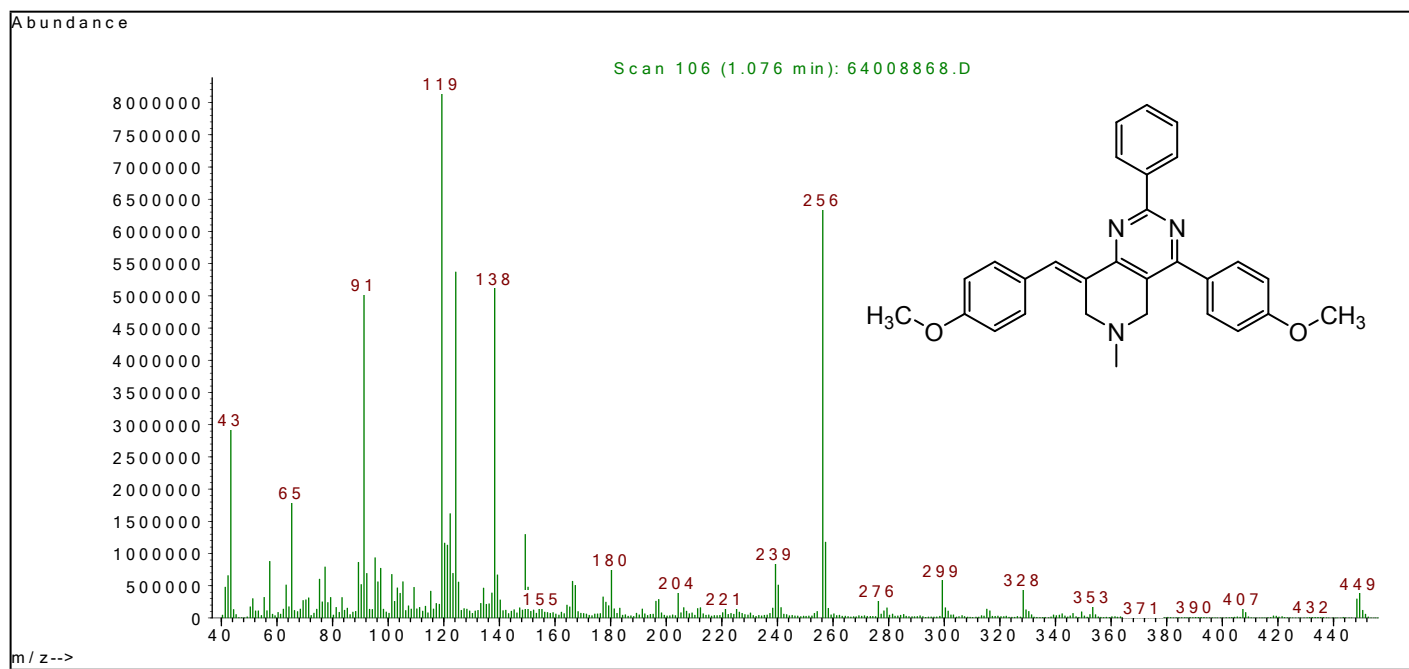

Fig S25: MS (EI) spectra of (E)-8-(4-methoxybenzylidene)-5,6,7,8-tetrahydro-4-(4-methoxyphenyl)-6-methyl-2-phenylpyrido[4,3-d]pyrimidine (3g)

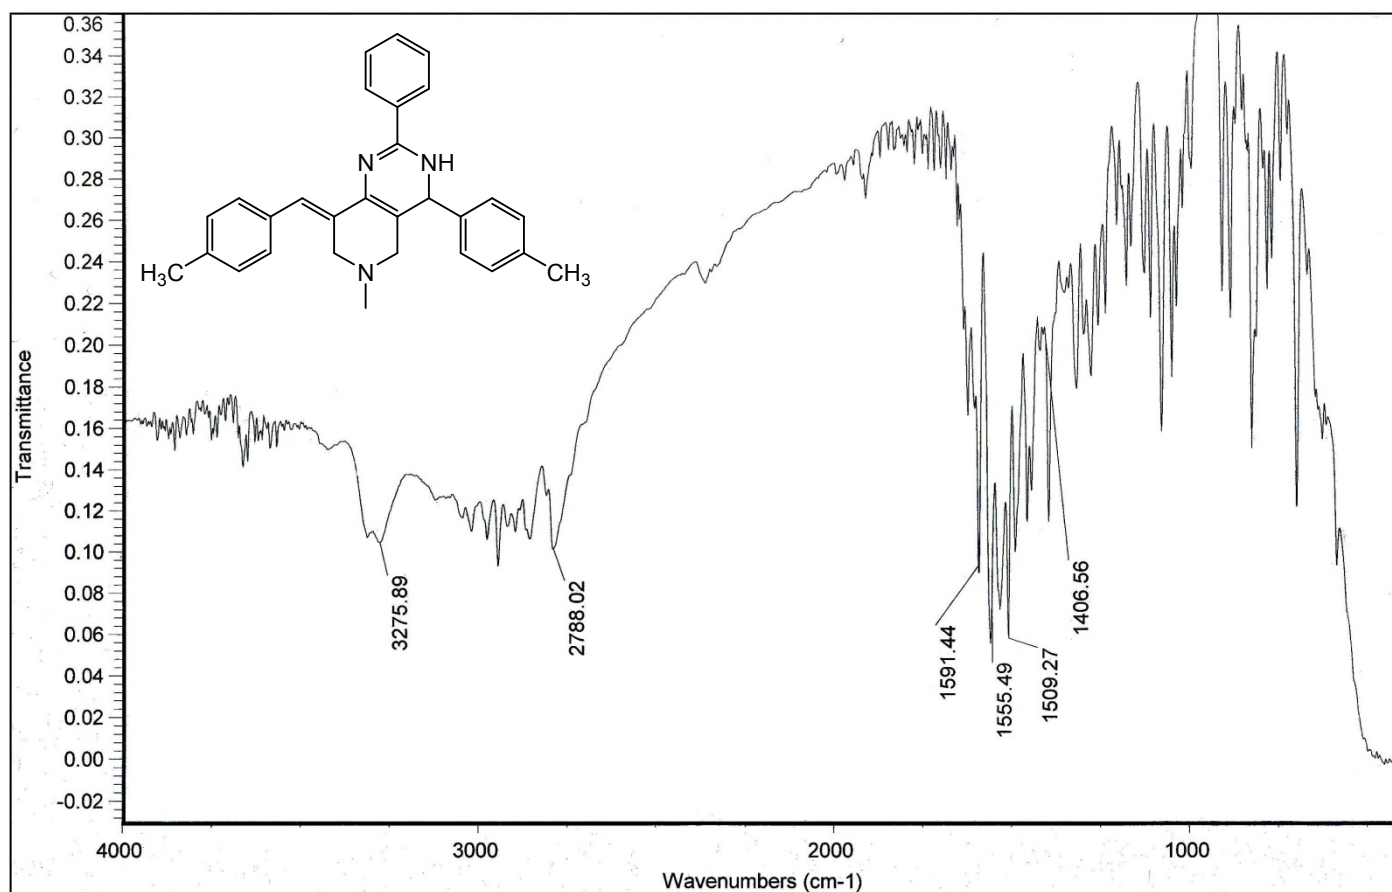

Fig S26: Ft-IR spectra of (8E)-8-(4-methylbenzylidene)-4-(4-methylphenyl)-2,3,5,6,7,8-hexahydro-6-methyl-2-phenylpyrido[4,3-d]pyrimidine (3h)

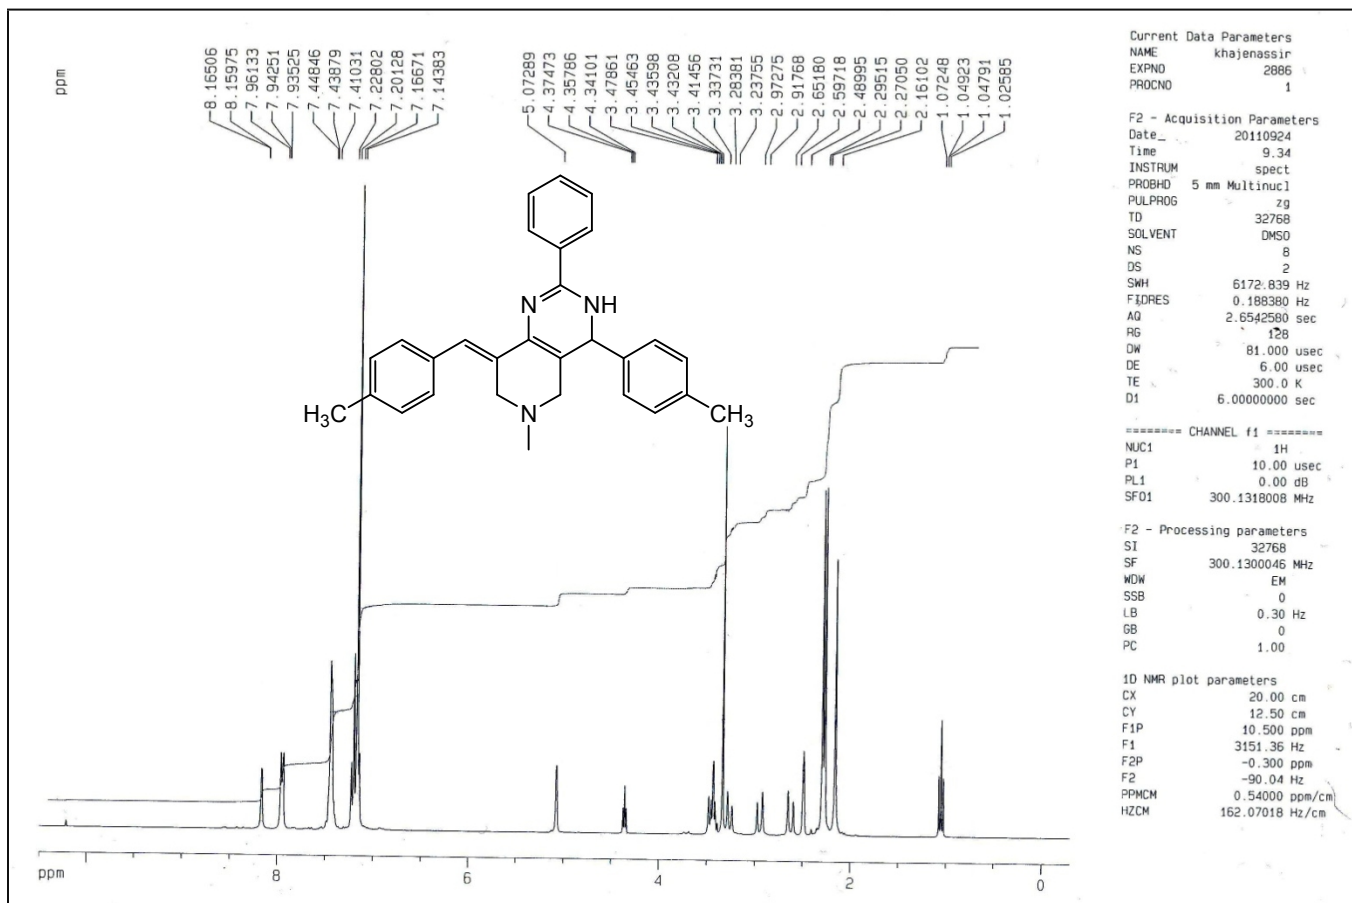

Fig S27:  $^1\text{H}$  NMR (300 MHz,  $\text{DMSO-}d_6$ ) spectra of (8E)-8-(4-methylbenzylidene)-4-(4-methylphenyl)-2,3,5,6,7,8-hexahydro-6-methyl-2-phenylpyrido[4,3-d]pyrimidine (3h)

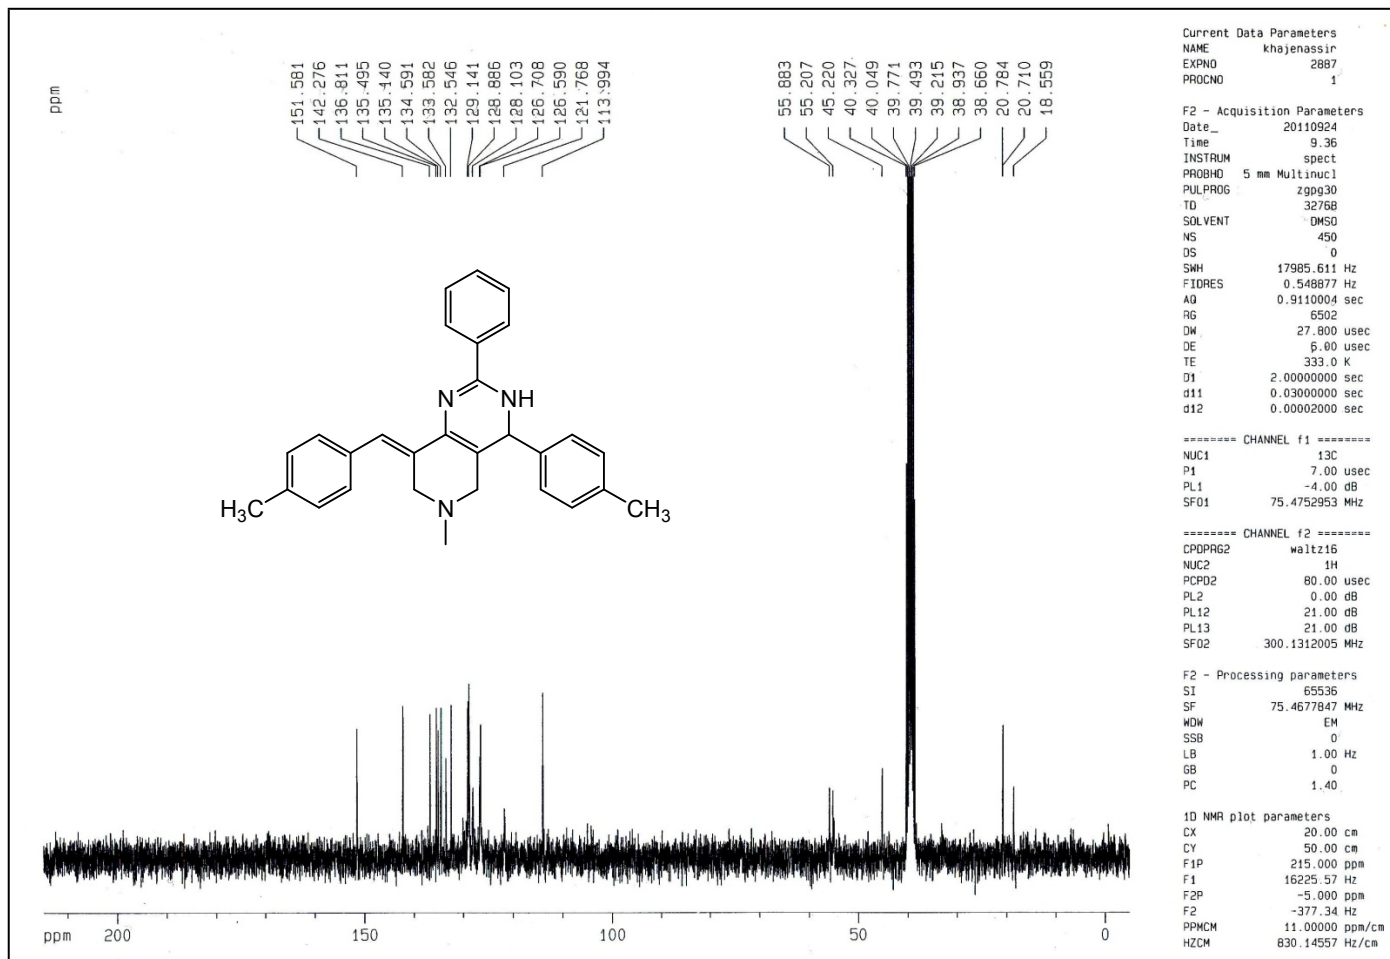

Fig S28:  $^{13}\text{C}$  NMR (75 MHz,  $\text{DMSO-}d_6$ ) spectra of (8E)-8-(4-methylbenzylidene)-4-(4-methylphenyl)-2,3,5,6,7,8-hexahydro-6-methyl-2-phenylpyrido[4,3-d]pyrimidine (3h)

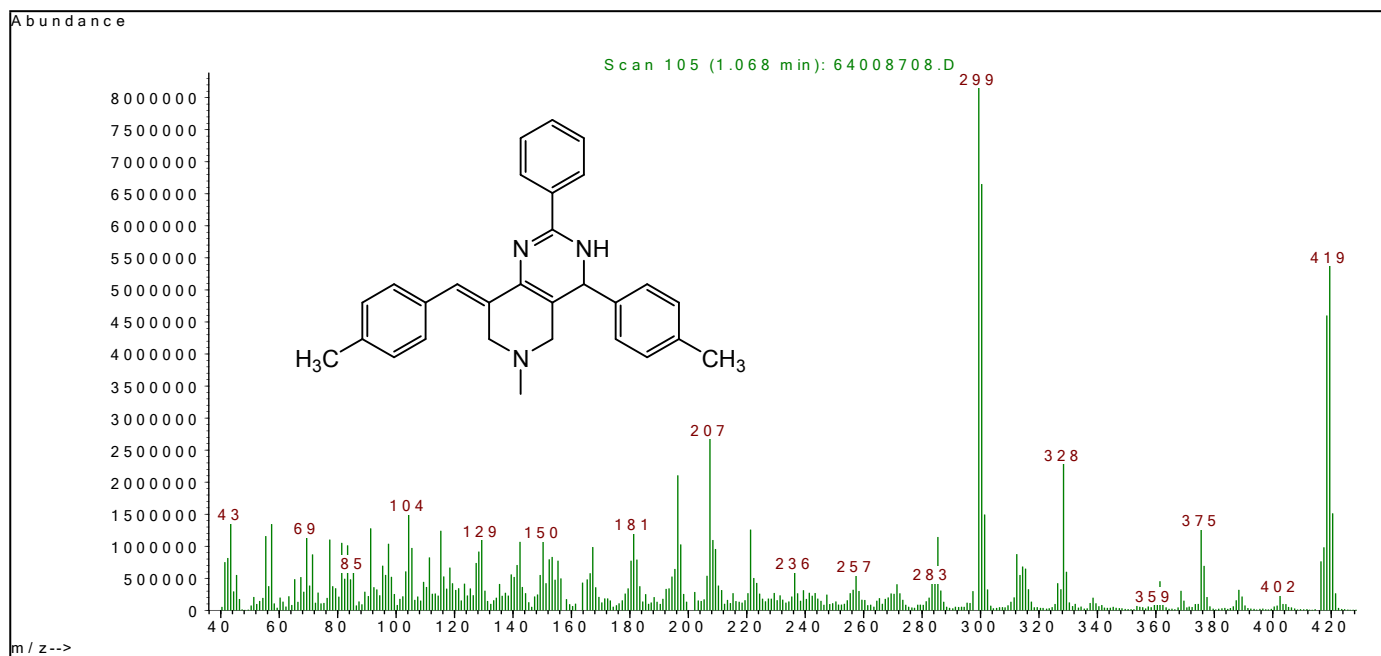

Fig S29: MS (EI) spectra of (8E)-8-(4-methylbenzylidene)-4-(4-methylphenyl)-2,3,5,6,7,8-hexahydro-6-methyl-2-phenylpyrido[4,3-d]pyrimidine (3h)

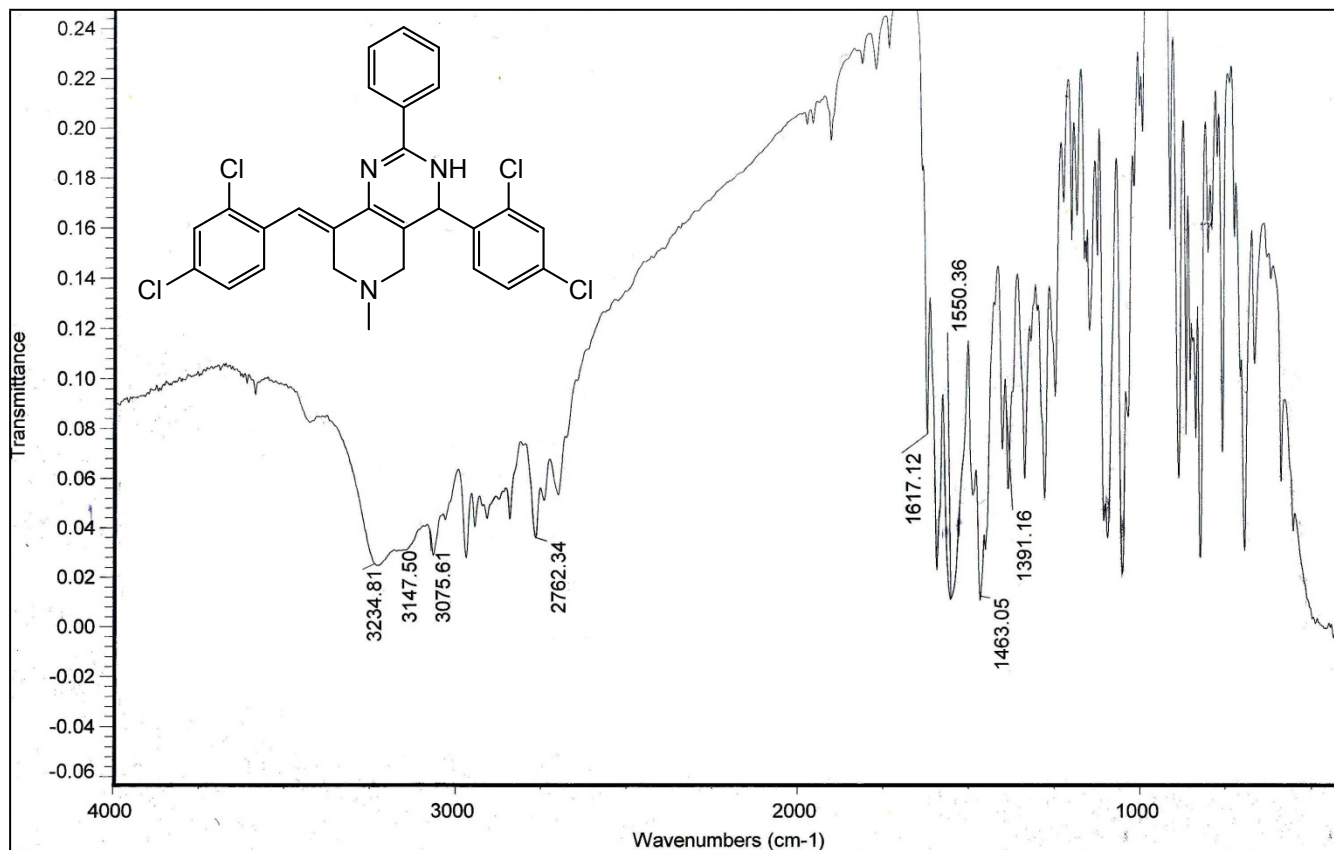

Fig S30: Ft-IR spectra of (8E)-8-(2,4-dichlorobenzylidene)-4-(2,4-dichlorophenyl)-2,3,5,6,7,8-hexahydro-6-methyl-2-phenylpyrido[4,3-d]pyrimidine (3i)



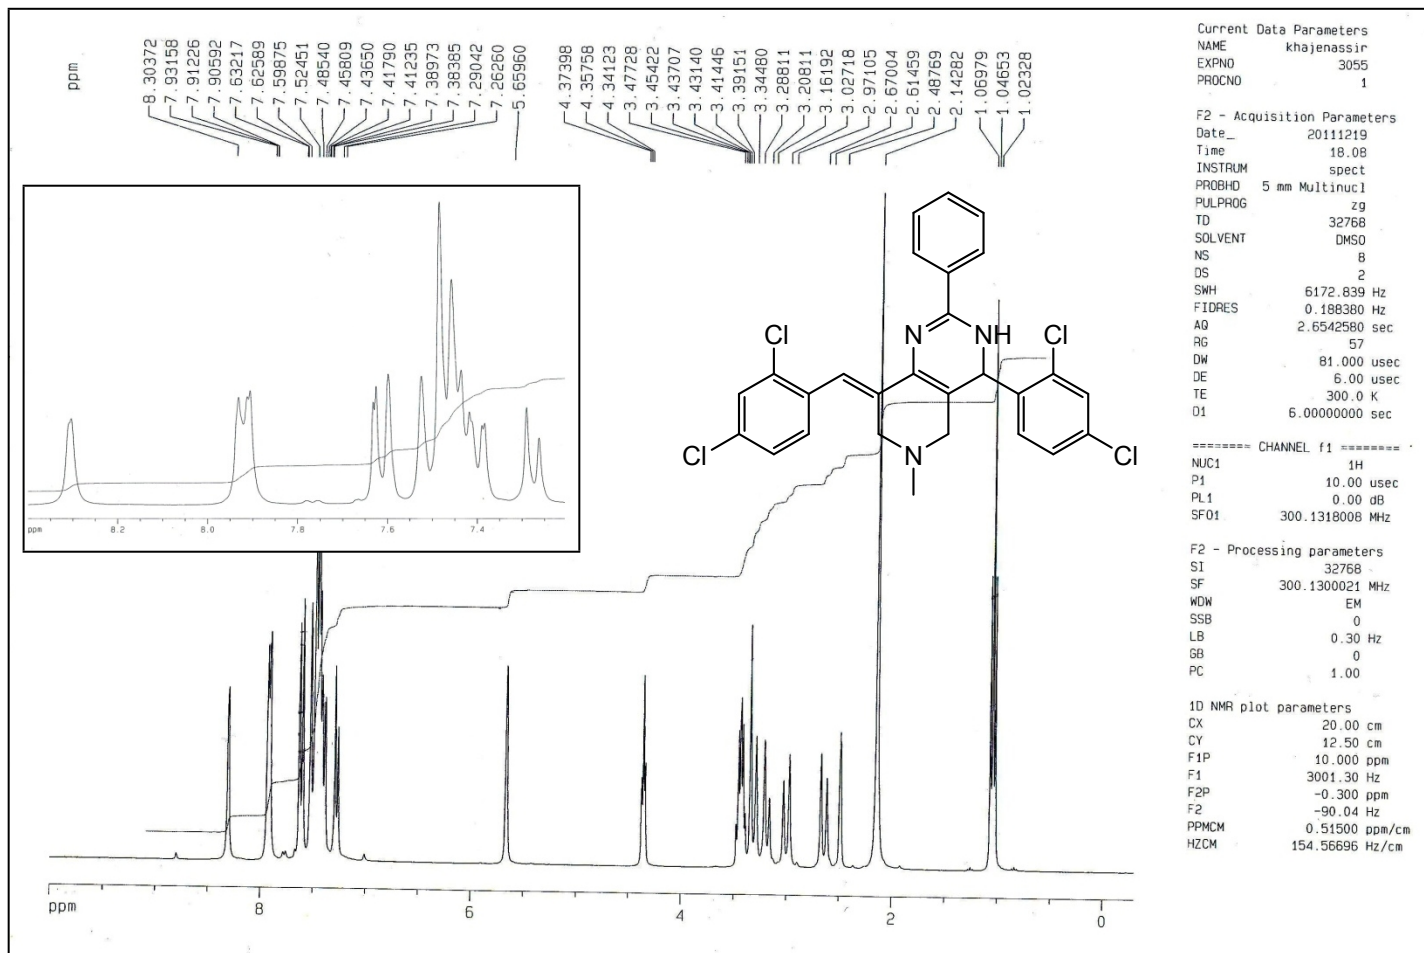

Fig S31:  $^1\text{H}$  NMR (300 MHz,  $\text{DMSO-}d_6$ ) spectra of (8E)-8-(2,4-dichlorobenzylidene)-4-(2,4-dichlorophenyl)-2,3,5,6,7,8-hexahydro-6-methyl-2-phenylpyrido[4,3-d]pyrimidine (3i)

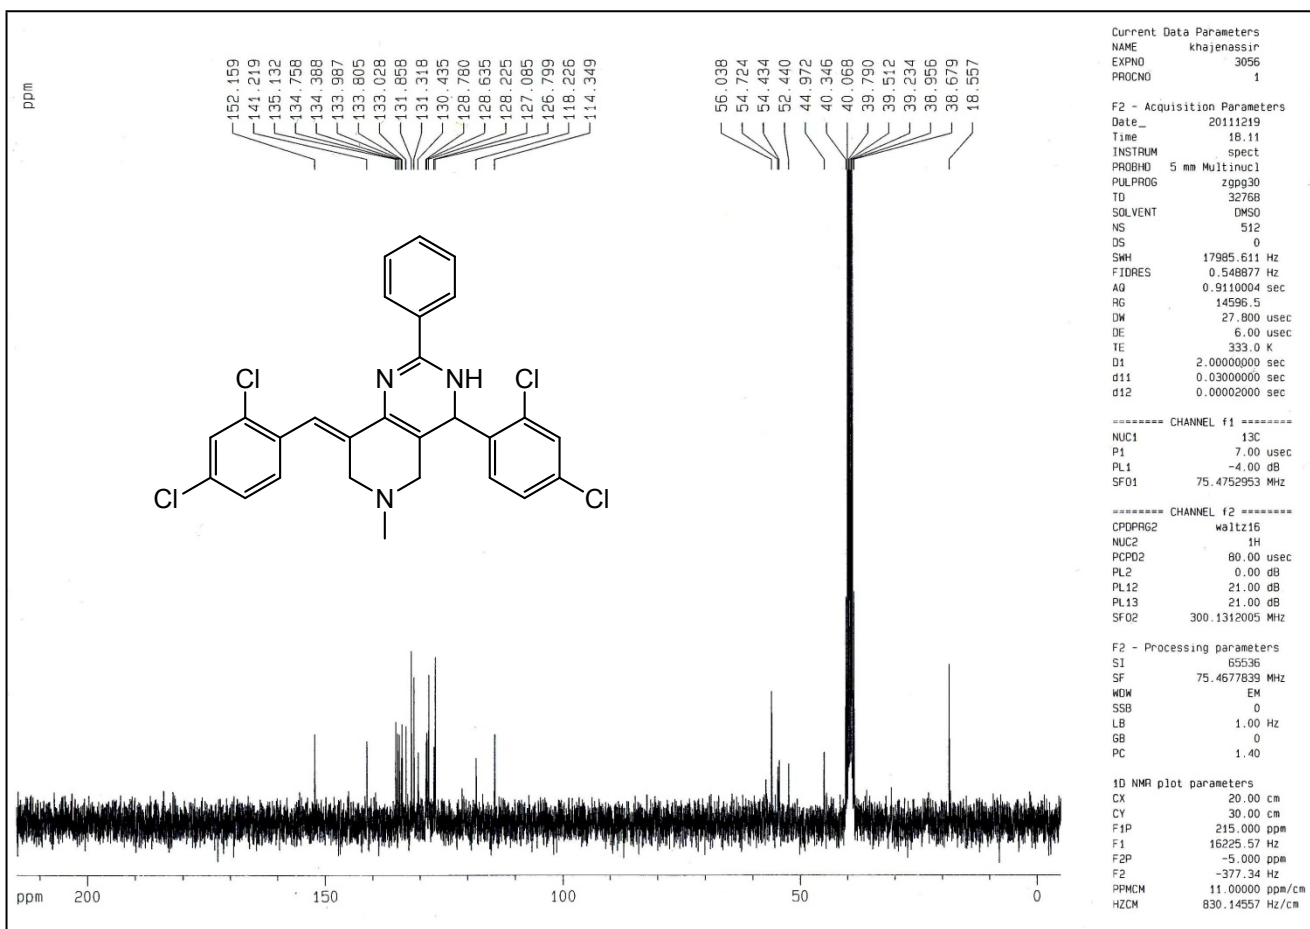

Fig S32:  $^{13}\text{C}$  NMR (75 MHz,  $\text{DMSO-}d_6$ ) spectra of (8E)-8-(2,4-dichlorobenzylidene)-4-(2,4-dichlorophenyl)-2,3,5,6,7,8-hexahydro-6-methyl-2-phenylpyrido[4,3-d]pyrimidine (3i)

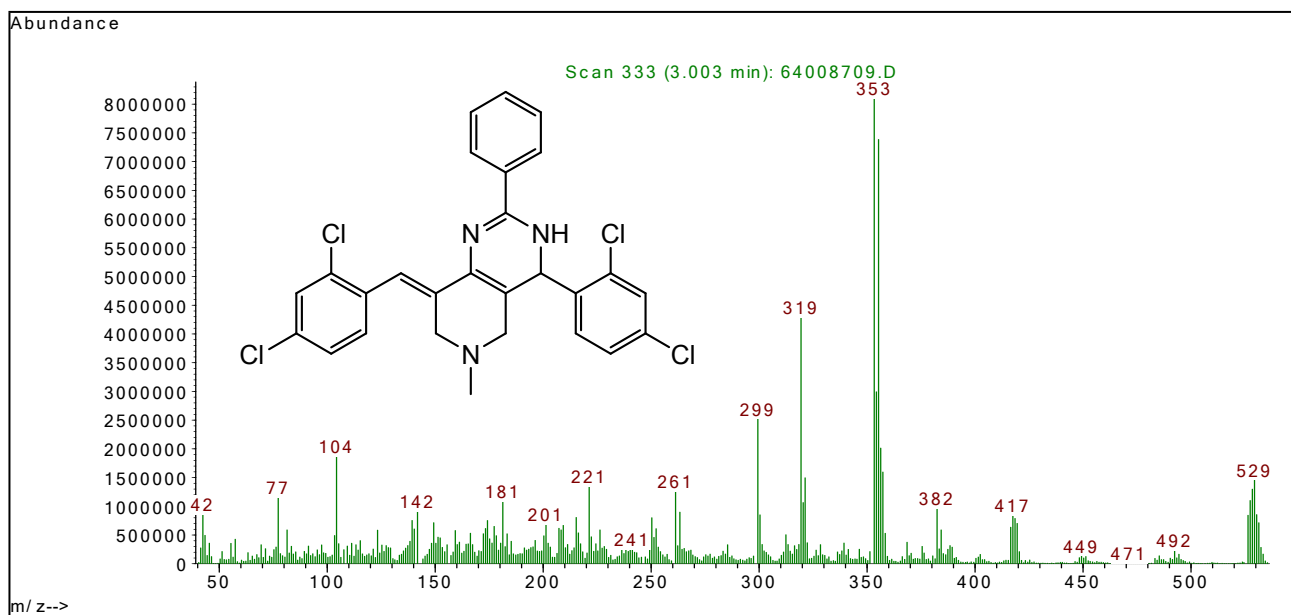

Fig S33: MS (EI) spectra of (8E)-8-(2,4-dichlorobenzylidene)-4-(2,4-dichlorophenyl)-2,3,5,6,7,8-hexahydro-6-methyl-2-phenylpyrido[4,3-d]pyrimidine (3i)

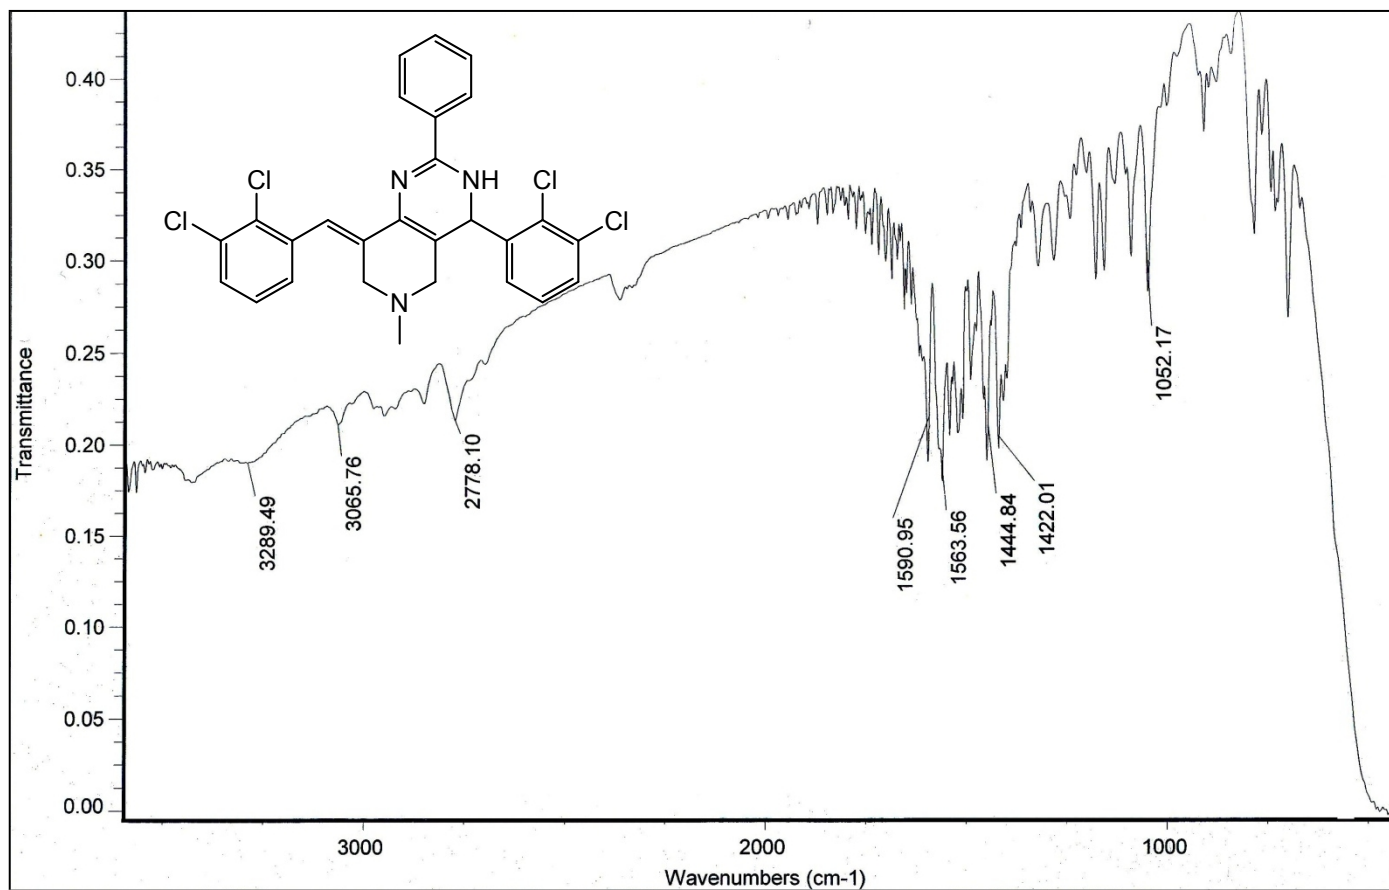

Fig S34: Ft-IR spectra of (8E)-8-(2,3-dichlorobenzylidene)-4-(2,3-dichlorophenyl)-2,3,5,6,7,8-hexahydro-6-methyl-2-phenylpyrido[4,3-d]pyrimidine (3j)

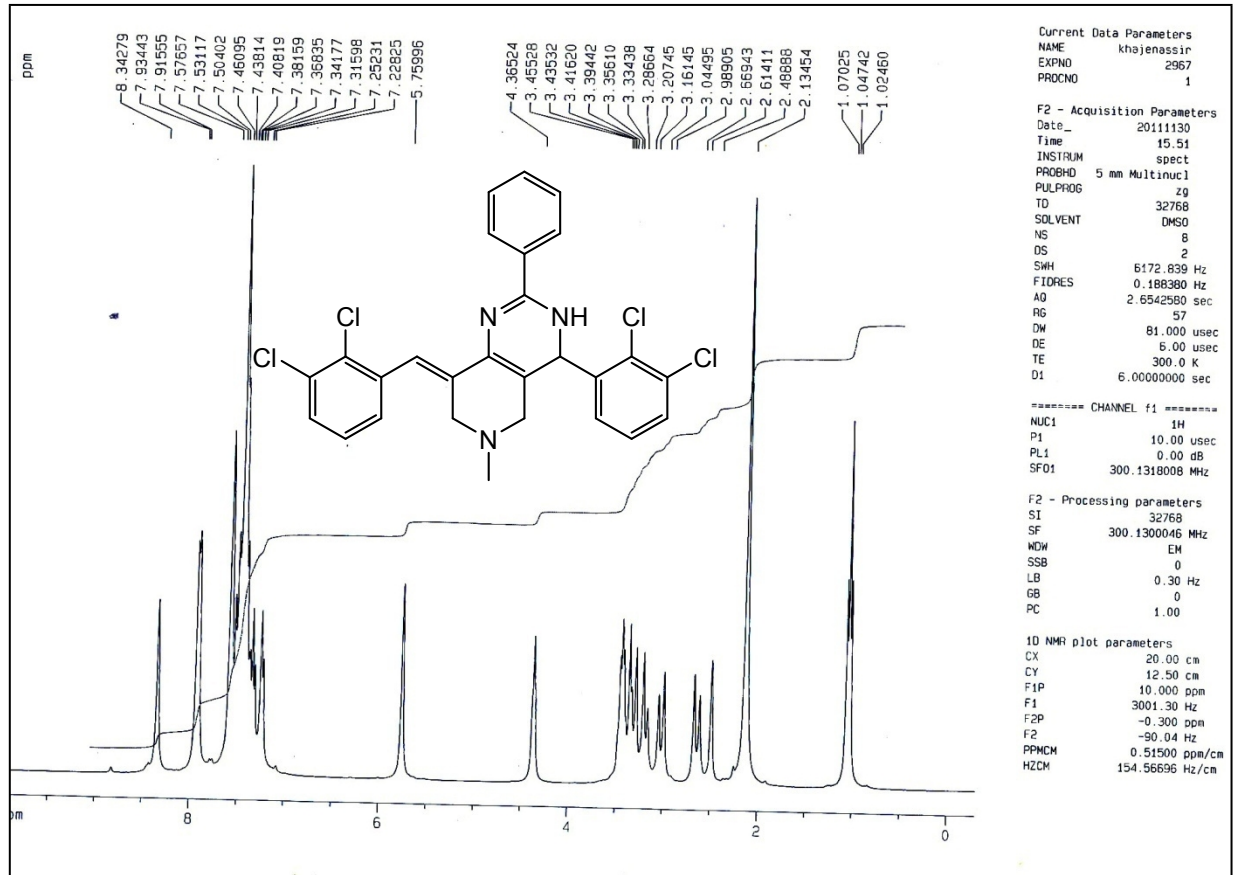

Fig S35: <sup>1</sup>H NMR (300 MHz, DMSO-*d*<sub>6</sub>) spectra of (8E)-8-(2,3-dichlorobenzylidene)-4-(2,3-dichlorophenyl)-2,3,5,6,7,8-hexahydro-6-methyl-2-phenylpyrido[4,3-d]pyrimidine (3j)

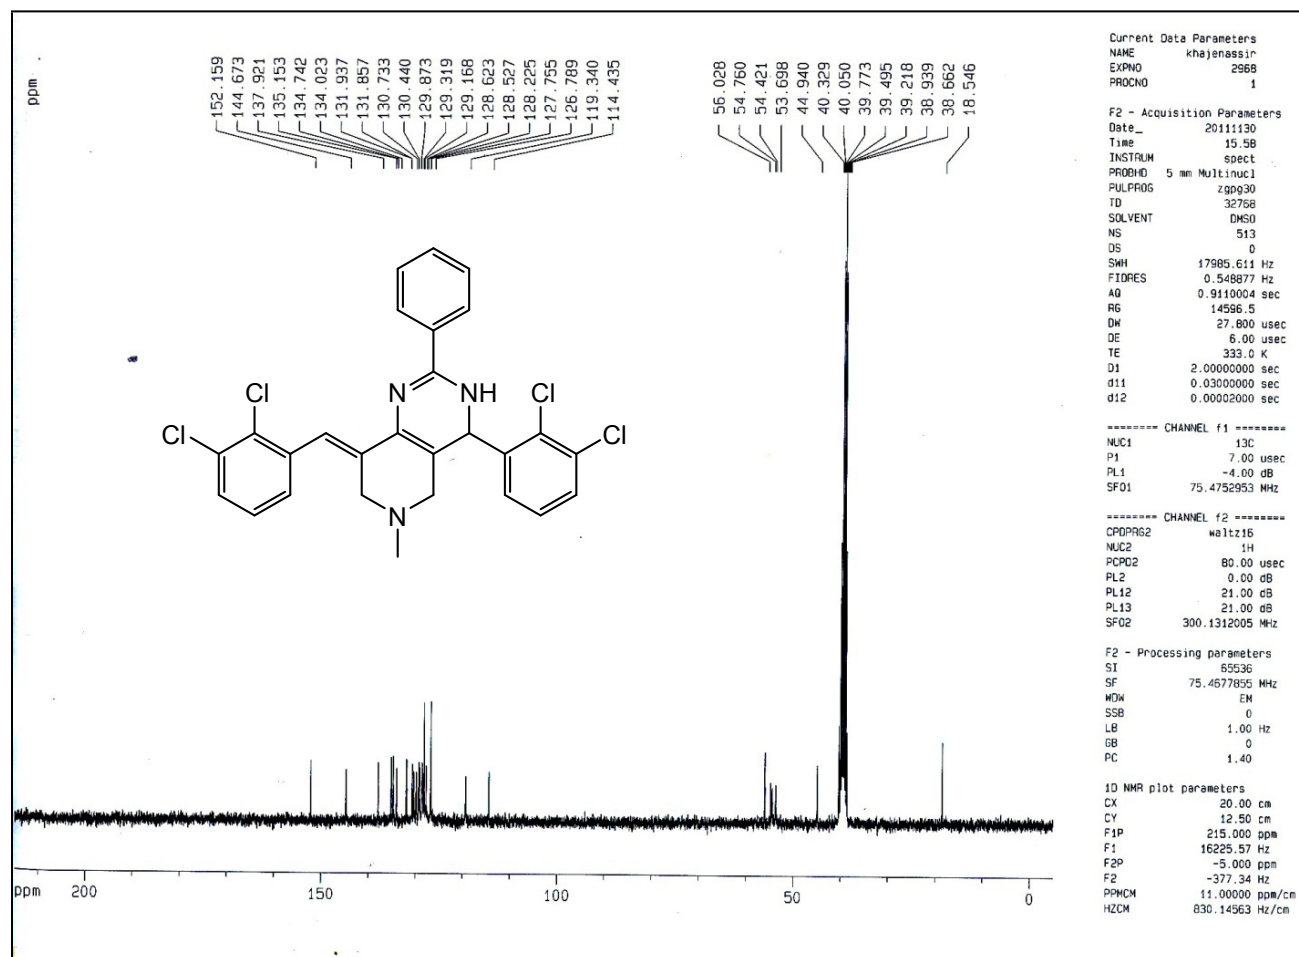

Fig S36:  $^{13}\text{C}$  NMR (75 MHz,  $\text{DMSO-}d_6$ ) spectra of (8E)-8-(2,3-dichlorobenzylidene)-4-(2,3-dichlorophenyl)-2,3,5,6,7,8-hexahydro-6-methyl-2-phenylpyrido[4,3-d]pyrimidine (3j)

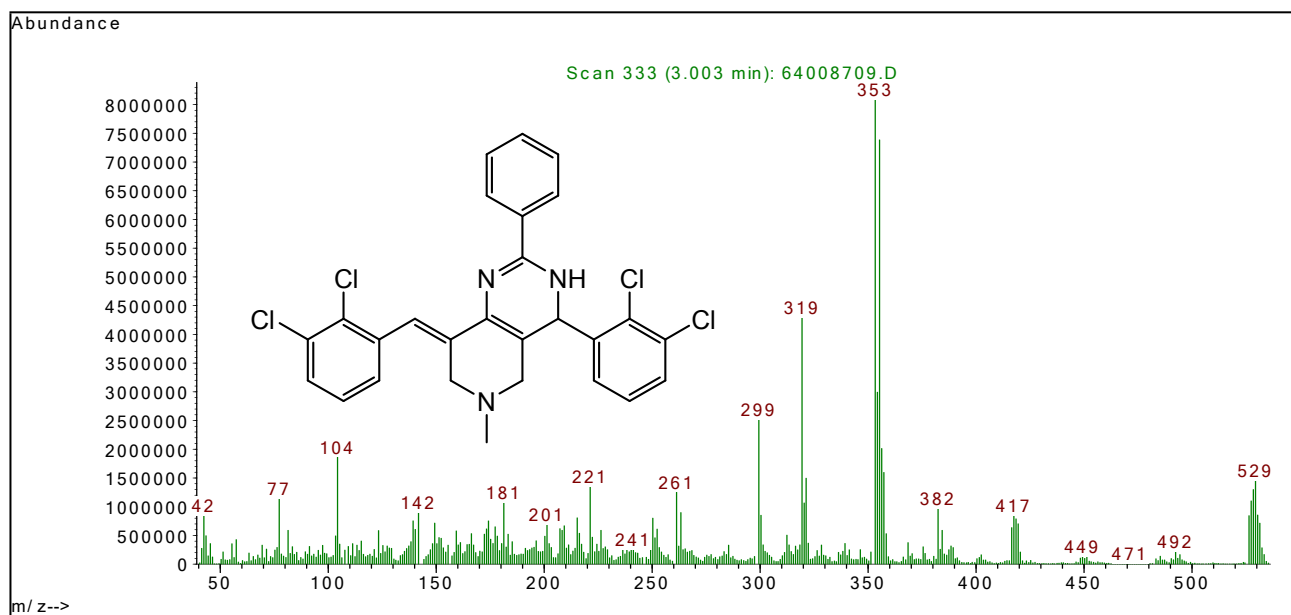

Fig S37: MS (EI) spectra of (8E)-8-(2,3-dichlorobenzylidene)-4-(2,3-dichlorophenyl)-2,3,5,6,7,8-hexahydro-6-methyl-2-phenylpyrido[4,3-d]pyrimidine (3j)
